# Supplementary material for: Telehealth Interventions to Support Self-Management of Long-Term Conditions: A Systematic Metareview of Diabetes, Heart Failure, Asthma, Chronic Obstructive Pulmonary Disease, and Cancer
Source: PubMed Central journal article supplement (PMC5451641; doi:10.2196/jmir.6688), 2017-05-17
Supplement: jmir_v19i5e172_app3.pdf [file jmir_v19i5e172_app3.pdf]

| Characteristics of Included Reviews |                                                                     |                                                                                                                                                                                 |                                                                                                                                                                                                                                 |                                                                                                                                                              |                                                                                                      |
|-------------------------------------|---------------------------------------------------------------------|---------------------------------------------------------------------------------------------------------------------------------------------------------------------------------|---------------------------------------------------------------------------------------------------------------------------------------------------------------------------------------------------------------------------------|--------------------------------------------------------------------------------------------------------------------------------------------------------------|------------------------------------------------------------------------------------------------------|
| Review                              | Intervention of interest                                            | Participant demographics                                                                                                                                                        | Setting, delivery mode,                                                                                                                                                                                                         | Content, focus, and mode of instruction                                                                                                                      | Duration, intensity, and follow-up                                                                   |
| <b>Diabetes Reviews</b>             |                                                                     |                                                                                                                                                                                 |                                                                                                                                                                                                                                 |                                                                                                                                                              |                                                                                                      |
| <b>Baron 2012</b>                   | Mobile telemonitoring of blood glucose                              | Type 1 diabetes – 2 RCTs – mean age 23.8 and 35.7, % male 43% and 59.1%, respectively<br>Type 2 diabetes – 10 RCTs – mean age ranged 46.9 to 63.9, % male ranged 36.6% to 78.3% | All interventions involved transmission of data from a mobile device to a central server, from where the participants would then obtain specific feedback.                                                                      | Focus was on aiding patients in interpretation of self-monitored data with the aim of improving self-management.                                             | Duration 3-12 months<br>Daily to fortnightly data transmission.<br>Follow-up ranged from 3-12 months |
| <b>Beatty 2013</b>                  | Internet based self-help programmes                                 | Type 2 diabetes<br>Mean age ranged 40.6 to 61.5                                                                                                                                 | 3/5 "diabetes-Net" online programme with professional online support<br>1/5 "Internet Diabetes Self-Management Programme" – includes moderated forum<br>1/5 CD-ROM tailored self-management with professional telephone support | 4/5 conducted by the same group, investigating different levels of professional input to an online diabetes self-management programme.                       | 3/5 reported duration, range 6 to 8 weeks                                                            |
| <b>Berat-arrechea 2014</b>          | Mobile health interventions                                         | One type 2 diabetes. Two not specified.                                                                                                                                         | Limited to low- and middle-income countries.<br>All interventions delivered by SMS.                                                                                                                                             | One interventions involved SMS transmission of self-monitored glucose data with feedback from study doctor. Two educational interventions with SMS reminders | Glucose monitoring: daily.<br>One study followed up for 1 year.<br>Otherwise n.s.                    |
| <b>Cassimatis 2012</b>              | Behavioural telehealth interventions                                | n.s.                                                                                                                                                                            | Telephone counseling, videoconferencing, educational telephone based interventions.<br>Interventions could not be primarily telemonitoring.                                                                                     | All educational in focus.<br>10/13 telephone support<br>1/13 video messaging<br>2/13 phone messaging supplementing nurse follow-up                           | 5 weeks to 12 months duration<br>Follow up 3-12 months                                               |
| <b>Currell 2010</b>                 | Telemedicine – use of telecommunications to provide care            | Type 1 diabetes – 2 RCTs<br>Children over 5 years and patients aged 16-65, respectively                                                                                         | Transfer of self-monitored blood glucose readings via modem. Both also included clinic follow-up.                                                                                                                               | One RCT also included telephone counseling                                                                                                                   | Duration: 12 weeks to 12 months<br>Frequency: weekly to 2 weekly                                     |
| <b>De Jongh 2012</b>                | Mobile phone messaging for facilitating self-management             | Type 1 diabetes – Youth and young adults                                                                                                                                        | SMS sent between healthcare provider and participants' mobile phone.                                                                                                                                                            | 1/2 – medication reminders<br>1/2 – reminders for blood glucose monitoring, automated feedback plus diabetes related educational messages                    | 1 study, average 2.7 messages per day<br>1 study – 2 weekly                                          |
| <b>Farmer 2005</b>                  | Telemedicine interventions supporting blood glucose self-monitoring | 6/12 – type 1 diabetes<br>1/12 – both type 1 and 2 diabetes<br>2/12 did not specify<br>2/12 – pregnant participants with                                                        | Transmission of blood glucose results via a remote server.<br>Feedback was either automated or clinical delivered.<br>11/12 transmitted using telephone                                                                         | 11/12 evaluated telemedicine in addition to usual care.<br>4/12 transmitted self-management data (not                                                        | Duration 12 weeks to 1 year in the 9 pooled RCTs.<br>"Majority of trials" transmitted data weekly    |

|                           |                                                                                                                                             |                                                                                                                                                                                         |                                                                                                                                                                                                                                                                                                                                                                                                                                                                             |                                                                                                                                                                                    |                                                                                                                                                             |
|---------------------------|---------------------------------------------------------------------------------------------------------------------------------------------|-----------------------------------------------------------------------------------------------------------------------------------------------------------------------------------------|-----------------------------------------------------------------------------------------------------------------------------------------------------------------------------------------------------------------------------------------------------------------------------------------------------------------------------------------------------------------------------------------------------------------------------------------------------------------------------|------------------------------------------------------------------------------------------------------------------------------------------------------------------------------------|-------------------------------------------------------------------------------------------------------------------------------------------------------------|
|                           |                                                                                                                                             | type 1 diabetes<br>1/12 – gestational diabetes                                                                                                                                          | line or internet                                                                                                                                                                                                                                                                                                                                                                                                                                                            | specified) in addition to<br>blood glucose                                                                                                                                         |                                                                                                                                                             |
| <b>Farmer 2016</b>        | Monitoring or brief messaging interventions to support medication adherence.                                                                | Type 2 diabetes                                                                                                                                                                         | Most concerned mobile messaging. Some used specifically designed technologies such as electronic monitoring of blister packs.                                                                                                                                                                                                                                                                                                                                               | Mobile messaging delivered by clinician. Algorithmic responded designed to support medication adherence.                                                                           | Duration: 6 weeks to 1 year<br>Intensity: Daily to weekly                                                                                                   |
| <b>Flodgren 2015</b>      | Telemedicine interventions grouped into <i>remote monitoring, store and forward applications, and interactive (real-time) telemedicine.</i> | 8 RCTs – type 1 diabetes<br>Mean age 9 to 41<br>One RCT of pregnant women with type 1 diabetes<br>6 RCTs – type 2 diabetes<br>Mean age 46 to 72<br>7 RCTs – mixed type 1 and 2 diabetes | Type 1 diabetes:<br>4 self-monitored glucometer data with transfer<br>1 smartphone application with data transfer<br>2 internet based interventions<br>1 videoconferencing intervention<br>Type 2 diabetes<br>1 mobile intervention<br>2 internet based interventions<br>1 glucometer with transfer<br>1 HTM unit<br>1 videoconferencing<br>Mixed diabetes<br>3 internet interventions<br>2 glucometer readings with transfer<br>2 videoconferencing interventions<br>1 HTM | 11 RCTs had a specific educational focus. All focused on review of clinical data – some self-monitored glucose data.                                                               | Data transfer daily to monthly<br>Follow-up 3 to 18 months                                                                                                  |
| <b>Garcia-Lizana 2007</b> | Information communication technology (excluding telephone-only) for chronic disease management                                              | 1/7 children<br>1/7 aged 15/20<br>5/7 not specified                                                                                                                                     | n.s.                                                                                                                                                                                                                                                                                                                                                                                                                                                                        | 4/7 involved transmission of blood sugar. 3 of these provided telephone feedback.<br>3/7 predominantly education delivery by internet (2/7) and 'telemedicine' (not defined) (1/7) | Follow-up 6 weeks to 12 months                                                                                                                              |
| <b>Graziano 2009</b>      | Isolated telephone interventions for type 2 diabetes                                                                                        | 5/8 type 2 diabetes only<br>1/8 95% type 2 diabetes<br>2/8 not specified<br>Mean age 60 years<br>7/8 reported insulin use – mean 34% in these studies                                   | Outgoing calls to patients with type 2 diabetes                                                                                                                                                                                                                                                                                                                                                                                                                             | 6/8 evaluated telephone-only interventions for glycaemic control<br>2/8 evaluated telephone components of broader interventions                                                    | Duration 3 to 12 months<br>5/8 twice weekly calls<br>2/8 reported number of contacts (3-4 and 13 respectively)<br>1/8 not reported<br>Follow-up 3-12 months |
| <b>Greenwood 2014</b>     | Remote patient monitoring incorporating structured self-monitoring of blood glucose                                                         | Type 2 diabetes                                                                                                                                                                         | Any method of remote interaction and healthcare delivery (including telephone, video, text message, vital signs monitoring)                                                                                                                                                                                                                                                                                                                                                 | Interventions involved at least one of seven elements of structured self-monitoring of blood glucose:<br>1. patient education<br>2. healthcare                                     | n.s.                                                                                                                                                        |

|                    |                                                                                       |                                                                                                         |                                                                                                                                                                                                                                                                            |                                                                                                                                                                                                                                                                                                                                                     |                                                                          |
|--------------------|---------------------------------------------------------------------------------------|---------------------------------------------------------------------------------------------------------|----------------------------------------------------------------------------------------------------------------------------------------------------------------------------------------------------------------------------------------------------------------------------|-----------------------------------------------------------------------------------------------------------------------------------------------------------------------------------------------------------------------------------------------------------------------------------------------------------------------------------------------------|--------------------------------------------------------------------------|
|                    |                                                                                       |                                                                                                         |                                                                                                                                                                                                                                                                            | <p>provider education</p> <ol style="list-style-type: none"> <li>3. specific self-monitoring profile (frequency and intensity)</li> <li>4. Specific pre- and post-meal blood glucose goals</li> <li>5. Blood glucose data used to modify behaviour</li> <li>6. Evidence of feedback to patient</li> <li>7. Evidence of 2-way interaction</li> </ol> |                                                                          |
| <b>Hamine 2015</b> | Mobile phone interventions to promote medication adherence                            | Results for diabetes used. No further details given                                                     | n.s. for diabetes RCTs separately from other trial types                                                                                                                                                                                                                   | n.s. for diabetes RCTs separately from other trial types                                                                                                                                                                                                                                                                                            | n.s. for diabetes RCTs separately from other trial types                 |
| <b>Holtz 2012</b>  | Mobile phone interventions for diabetes management                                    | 57% of studies included type 1 diabetes only<br>19% type 2 diabetes<br>10% mixed<br>14% did not specify | 71% used a study specific application, others simple messaging.<br>52% involved messaging                                                                                                                                                                                  | 81% used a diary function<br>39% used educational messaging<br>71% used automatic transmission of blood glucose data from glucometer to phone                                                                                                                                                                                                       | Duration 2 weeks to 1 year                                               |
| <b>Huang 2015</b>  | Self-monitored transmission of glucometer data with healthcare professional feedback. | Type 2 diabetes<br>% female ranged 38.75 to 71.67                                                       | 5 telephone based<br>11 Internet based<br>2 automated                                                                                                                                                                                                                      | n.s.                                                                                                                                                                                                                                                                                                                                                | Duration 3 to 60 months                                                  |
| <b>Jaana 2007</b>  | Home telemonitoring (automated transmission of clinical data) for diabetes            | Type 1 or 2 diabetes<br>Average age ranged from 13 to 69                                                | 11/13 – glucometer linked to phone, video or internet for transmission of data.<br>2/13 – electronic diary with data transmission/reminders.<br>Older studies tended to use phone only with internet and videoconferencing being used for feedback in more recent studies. | All involved transmission of blood glucose measurements.<br>3/13 also included lifestyle/behavioural data                                                                                                                                                                                                                                           | Duration 3 to 15 months                                                  |
| <b>Kok 2011</b>    | e-health interventions (interaction                                                   | 9/12 RCTs concerned diabetes<br>5/9 type 2 diabetes<br>2/9 not specified                                | All web based, combination of videoconferencing, discussion, education website and email.                                                                                                                                                                                  | 5/9 evaluated e-health in addition to usual care, 4/9 instead of usual care.                                                                                                                                                                                                                                                                        | Follow-up: 3-30 months, and until birth in study of gestational diabetes |

|                       |                                                                                      |                                                                                                                                             |                                                                                                                                                                                                                                            |                                                                                                                                                                                                |                                                                                                                 |
|-----------------------|--------------------------------------------------------------------------------------|---------------------------------------------------------------------------------------------------------------------------------------------|--------------------------------------------------------------------------------------------------------------------------------------------------------------------------------------------------------------------------------------------|------------------------------------------------------------------------------------------------------------------------------------------------------------------------------------------------|-----------------------------------------------------------------------------------------------------------------|
|                       | between patient and healthcare provider via internet) to support self-management     | 1/9 type 1 or 2<br>1/9 indigent women with diabetes                                                                                         |                                                                                                                                                                                                                                            | 9/9 offered web-based education<br>4/9 gave feedback on glucose monitoring data<br>2/9 incorporated videoconferencing                                                                          |                                                                                                                 |
| <b>Krishna 2008</b>   | Diabetes self-management via cell-phone                                              | Type 1 or 2 diabetes<br>6/18 studies involving children<br>12/18 involving adults                                                           | All participants received face-to-face diabetes care with the intervention groups also receiving cell-phone based input in addition.<br>Delivery was by SMS, voice-mail, internet or email.                                                | Interventions included educational messages, reminders, management plans and input of self-monitoring blood glucose data.                                                                      | 3-12 months duration<br>Daily to weekly input                                                                   |
| <b>Krishna 2009</b>   | Delivery of health information or education by mobile phone or messaging             | 9/25 studies focused on diabetes<br>4/9 type 1 diabetes<br>5/9 type 2 diabetes                                                              | Delivery by SMS (9/9) plus voice interaction (3/9) or internet (5/9).                                                                                                                                                                      | All had an educational focus. 7/9 included support for blood glucose monitoring, medication dose and lifestyle. 1/9 focused on hypoglycaemic events.                                           | Duration 3 to 12 months<br>Frequency – 2/9 daily, 7/9 weekly.                                                   |
| <b>Kujipers 2012</b>  | Web-based interventions for patient empowerment and physical activity                | Mean age 60 years (all conditions)                                                                                                          | Web based – included online interaction with professional – usually study nurse                                                                                                                                                            | Online support promoting self-management and physical activity programmes with peer support and professional feedback.                                                                         | Duration 6 weeks to 18 months.<br>Frequency and intensity “poorly reported in studies”                          |
| <b>Liang 2011</b>     | Mobile phone interventions for diabetes self-management                              | 9/22 type 1 diabetes<br>10/22 type 2 diabetes<br>2/22 mixed<br>1/22 unspecified<br>Mean age 44 years<br>Mean duration of diabetes 6.4 years | 12/22 SMS and internet<br>8/22 SMS alone<br>2/22 compared SMS and internet                                                                                                                                                                 | All contained reinforcement of lifestyle management<br>Most encouraged self-monitoring of blood glucose<br>5/22 tailored SMS interventions                                                     | 14/22 daily<br>3/22 weekly<br>4/22 unspecified<br>Median follow-up 6 months (range 3-12 months)                 |
| <b>Lieber 2011</b>    | Telemonitoring of blood glucose data                                                 | 4/5 type 2 diabetes<br>1/5 type 1 diabetes                                                                                                  | n.s.                                                                                                                                                                                                                                       | n.s.                                                                                                                                                                                           | Follow-up 6-12 months                                                                                           |
| <b>Marcolino 2013</b> | Telemedicine interventions for type 1 or type 2 diabetes                             | n.s.                                                                                                                                        | 8/13 primary care, 4/13 secondary care, 1/13 primary and secondary care<br>Exchange of clinical information between patient and healthcare provider by computer, videoconferencing, telephone or mobile device, in addition to usual care. | Interventions either monitored clinical values or combined monitoring with education.<br>Educational components included phone calls, videoconferencing, SMS, websites, educational reminders. | Duration: 6-18 months (6/13 6 months, 6/13 12 months, 1/13 18 months)<br>8/13 reported weekly data transmission |
| <b>Montori 2004</b>   | Telecare (transmission of glucometer data with healthcare professional feedback) for | Type 1 diabetes.<br>7/8 adult patients<br>1/8 paediatric patients<br>All studies recruited patients with poor glycaemic control             | Transmission of glucometer data with professional feedback                                                                                                                                                                                 | n.s.                                                                                                                                                                                           | Daily to 2 weekly transmission<br>Daily to 4 weekly feedback                                                    |

|                                          |                                                                                    |                                                                                                                                                                               |                                                                                                                                                                                                                                                                        |                                                                                                                                                                                                                                                                                                                                     |                                                                                                                                         |
|------------------------------------------|------------------------------------------------------------------------------------|-------------------------------------------------------------------------------------------------------------------------------------------------------------------------------|------------------------------------------------------------------------------------------------------------------------------------------------------------------------------------------------------------------------------------------------------------------------|-------------------------------------------------------------------------------------------------------------------------------------------------------------------------------------------------------------------------------------------------------------------------------------------------------------------------------------|-----------------------------------------------------------------------------------------------------------------------------------------|
|                                          | type 1 diabetes.                                                                   |                                                                                                                                                                               |                                                                                                                                                                                                                                                                        |                                                                                                                                                                                                                                                                                                                                     |                                                                                                                                         |
| <b>Medical Advisory Secretariat 2009</b> | Home telemonitoring                                                                | Type 2 diabetes<br>Mean age ranged 45 to 71 years                                                                                                                             | Self-monitored blood-glucose data transmitted to healthcare professional that provided feedback.<br>4/8 used automated, linked glucometers<br>4/8 manually sent data                                                                                                   | Specific training given to intervention group, although content of this not reported.<br>Interventions also included videoconferencing (2/8), web-based education (5/8), monitoring of lifestyle factors (7/8).                                                                                                                     | Frequency poorly reported.<br>Weekly to monthly when available.<br>Duration and follow-up 6-30 months.                                  |
| <b>Mushcab 2015</b>                      | Web-based remote monitoring                                                        | Type 2 diabetes<br>Age data incomplete                                                                                                                                        | Web-based transmission of self-monitored blood glucose data.                                                                                                                                                                                                           | n.s.                                                                                                                                                                                                                                                                                                                                | Duration 3 to 18 months                                                                                                                 |
| <b>Polisena 2009</b>                     | "home telehealth" – transmission of clinical data from home to healthcare provider | Type 1 and 2 diabetes – 4 studies did not specify.<br>Patients with impaired cognitive function, language barrier or major chronic illnesses were excluded from most studies. | Home telemonitoring included synchronous (audio- and video-conferencing) and asynchronous (transmission via internet, video clips or electronic clinical data).<br>Telephone support involved phone contact only without the transmission of clinical or outcome data. | Home telemonitoring:<br>11/12 focused on transmission of blood glucose data<br>1/12 had an educational focus<br>2/12 included transmission of other biological data<br>1/12 reinforced lifestyle advice<br>Telephone support:<br>3/5 focused on lifestyle intervention<br>2/5 monitored blood glucose<br>4/5 had an education focus | Follow-up 3 months to 3 years<br>Home telemonitoring frequency – daily to 2 weekly<br>Telephone support frequency – weekly to 3 weekly. |
| <b>Safari 2014</b>                       | Health education interventions delivered via mobile phone.                         | Type 2 diabetes<br>Mean age ranged 47 to 63<br>% males ranges 22.2 to 51                                                                                                      | Mobile phone SMS delivery                                                                                                                                                                                                                                              | Education focus including reminders and dietary/lifestyle information and prompts.                                                                                                                                                                                                                                                  | Duration 3 months to 1 year.                                                                                                            |
| <b>Small 2013</b>                        | Telephone-based self-management interventions                                      | Review focus on vascular diseases<br>7 RCTs of interventions for type 2 diabetes. 1807 participants                                                                           | Telephone interventions by trained 'lay health workers'.                                                                                                                                                                                                               | Educational content to telephone interventions. 3 RCTs specifically addressed adherence. 4 RCTs contained specific lifestyle interventions.                                                                                                                                                                                         | Intensity ranged from weekly to 3 monthly phone calls.                                                                                  |
| <b>Suksomboon 2014</b>                   | Telephone interventions for diabetes                                               | n.s.                                                                                                                                                                          | Telephone only interventions – excluded those with other technologies                                                                                                                                                                                                  | 2/5 educational focus<br>3/5 encouraged medication compliance<br>3/5 focused on problem solving and goal setting                                                                                                                                                                                                                    | Number of phone calls ranged from 2 to 16. Mean phone call length 9 to 15 minutes.                                                      |
| <b>Sutcliffe 2011</b>                    | ICT interventions to promote access and engagement of young people                 | 776 young people (Males = 499, Females = 277) with type 1 diabetes. Study sizes ranged from 28 to 123 (Mean = 78.3, SD = 30.78). The mean age of                              | Video- or tele-conferencing<br>Telephone support<br>Novel electronic devices transferring clinical data<br>Web based discussion boards                                                                                                                                 | n.s.                                                                                                                                                                                                                                                                                                                                | Duration 6-18 months                                                                                                                    |

|                              |                                                                                                                                      |                                                                                                                                                        |                                                                                                                                                                     |                                                                                                                                                                                                                          |                                                                                   |
|------------------------------|--------------------------------------------------------------------------------------------------------------------------------------|--------------------------------------------------------------------------------------------------------------------------------------------------------|---------------------------------------------------------------------------------------------------------------------------------------------------------------------|--------------------------------------------------------------------------------------------------------------------------------------------------------------------------------------------------------------------------|-----------------------------------------------------------------------------------|
|                              | with diabetes into healthcare                                                                                                        | patients ranged from 11.9 to 23.9 years (Mean = 16, SD = 3.74)                                                                                         |                                                                                                                                                                     |                                                                                                                                                                                                                          |                                                                                   |
| <b>Verhoeven 2007</b>        | Teleconsultation and videoconferencing for diabetes                                                                                  | Type 1 or type 2 diabetes mellitus. Videoconferencing included only type 2 diabetes                                                                    | Combination of primary and secondary care                                                                                                                           | 8 RCTs – teleconsultation<br>3 RCTs - videoconferencing                                                                                                                                                                  | n.s.                                                                              |
| <b>Verhoeven 2010</b>        | Comparison between synchronous and asynchronous teleconsultation                                                                     | Type 1 or type 2 diabetes mellitus                                                                                                                     | Both primary and secondary care.                                                                                                                                    | Unable to separate RCT data – n.s.                                                                                                                                                                                       | n.s. for RCT data                                                                 |
| <b>Viana 2016</b>            | Interventions aimed at improving patient compliance with therapies for glycaemic control in type 1 diabetes. Data for telecare used. | Type 1 diabetes.<br>Mean age ranged 13 to 43                                                                                                           | 2 RCTs – telephone based contact.<br>4 RCTs – self-monitored glucometer data transmitted via internet/mobile device.                                                | Feedback aimed a promotion of adherence to management plans to improve HbA1c.<br>2 telephone based RCTs educational in focus.<br>4 involved direct monitoring of self-monitored blood glucose data.                      | Most 6 month duration, one 9 month.<br>Data transmission twice weekly to monthly. |
| <b>Wens 2008</b>             | Educational interventions aimed at improving adherence to treatment recommendations in type 2 diabetes                               | Type 2 diabetes                                                                                                                                        | 2 RCTs delivered educational intervention via telemedicine. One telephone intervention. One telemedicine mediated 'visit' supplementing an educational class        | Both educational in focus.<br>Aimed at promoting adherence to lifestyle interventions as well as medication.                                                                                                             | Weekly intervention                                                               |
| <b>Wu 2010</b>               | Telephone follow-up                                                                                                                  | Type 2 diabetes, mean duration 8 years.<br>Mean age 63 years<br>50% female<br>13% controlled with diet only, 31% diet and oral agents, 56% on insulin. | All involved phone call to patient from a trained diabetes professional.<br>Some also incorporated calls from patients to an automated service.                     | Lifestyle 2/7<br>Self-care 6/7<br>Glucose monitoring 5/7<br>Therapy adjustment 5/7<br>Psychological input 2/7<br>Guideline driven 2/7<br>Physician input 3/7                                                             | Follow-up 6 to 18 months<br>Call frequency biweekly to monthly                    |
| <b>Zhai 2014</b>             | Telemedicine interventions (including web-based, teleconferencing, mobile and landline-based telephone interventions)                | Type 2 diabetes.<br>Mean age ranged 46 to 70.<br>% male ranged 37 to 75                                                                                | 12 RCTs – telephone based interventions<br>19 RCTs – internet based interventions<br>6 RCTs – Internet mediated data transmission<br>2 RCTs – messaging based (SMS) | Telephone based interventions were all educational in focus.<br>Internet mediated transfer involved clinical data monitoring. Internet-based interventions also involved uploading of self-monitored blood glucose data. | Duration 3-30 months                                                              |
| <b>Heart Failure Reviews</b> |                                                                                                                                      |                                                                                                                                                        |                                                                                                                                                                     |                                                                                                                                                                                                                          |                                                                                   |
| <b>Berat-</b>                | Mobile health                                                                                                                        | Heart failure.                                                                                                                                         | Limited to low- and middle-income                                                                                                                                   | Disease counseling and                                                                                                                                                                                                   | Weekly telephone                                                                  |

|               |                                                                                                                                                                                                                                                                                                |                                                                                                                                                                                                                                                                                                                     |                                                                                                               |                                                                                                                                                                                                                                                                                                                                                                                             |                                                                                                                                                                                                                  |
|---------------|------------------------------------------------------------------------------------------------------------------------------------------------------------------------------------------------------------------------------------------------------------------------------------------------|---------------------------------------------------------------------------------------------------------------------------------------------------------------------------------------------------------------------------------------------------------------------------------------------------------------------|---------------------------------------------------------------------------------------------------------------|---------------------------------------------------------------------------------------------------------------------------------------------------------------------------------------------------------------------------------------------------------------------------------------------------------------------------------------------------------------------------------------------|------------------------------------------------------------------------------------------------------------------------------------------------------------------------------------------------------------------|
| arrechea 2014 | interventions                                                                                                                                                                                                                                                                                  |                                                                                                                                                                                                                                                                                                                     | countries.<br>Delivery by mobile telephone                                                                    | access to telephone helpline.                                                                                                                                                                                                                                                                                                                                                               | intervention                                                                                                                                                                                                     |
| Chaudhry 2007 | Telemonitoring systems (any technology, including telephone) for heart failure. Telephone support included educational component. Also considered separately automated physiological monitoring (not considered self-management.)                                                              | 2627 participants (range 134-1518).<br>Mean age 65 to 72 years.<br>Percentage male ranged from 46 to 71.<br>Variation in severity of heart failure (NYHA IV ranged from 9-59%)                                                                                                                                      | All involved monitoring from centralised nurses. Delivered by telephone call.                                 | Symptom monitoring via live, nurse delivered, one-to-one phone call.<br>All were multi-faceted interventions which included an educational component addressing diet, medication adherence.<br>One intervention also included educational support to the patient's family.<br>One intervention included adjustment of diuretic doses, however this was under direction of the trial nurses. | Duration 6-12 months.<br>1 study weekly calls for 2 weeks then decreasing frequency. 2 studies 2 weekly calls for 8 weeks then decreasing frequency. 2 studies had 17 and 14 calls, respectively, over 6 months. |
| Ciere 2012    | Telehealth interventions (home-based self-monitoring of signs and symptoms with data transferred to remote healthcare professionals) delivered to community-dwelling patients with heart failure in which measures of knowledge, perceived self-efficacy of self-care behaviours were reported | Mean age of participants ranged 61-78 years.<br>proportion of males ranged from 37-99%, although gender was unreported in two studies.<br>Seven studies reported baseline severity of HF based on NYHA. Most were mild or moderately impaired. Some studies included those with no impairment or severe impairment. | Community setting<br>7/11 – home telehealth system<br>4/11 – telephone<br>1/11 – website<br>2/11 - videophone | 11/11 involved monitoring of signs and symptoms<br>9/11 included specific educational component                                                                                                                                                                                                                                                                                             | Duration 6 weeks to 12 months (median 3 months)<br>Most studies requested the patients use equipment daily.<br>Follow up ranged from 2-12 months                                                                 |
| Clarke 2011   | Telemonitoring for heart failure (excluded telephone-only interventions). Physiological monitoring but also addressed adherence.                                                                                                                                                               | 3480 patients<br>Mean age 55-85<br>Reporting of comorbidities highly variable.<br>All had LVEF <40%, NYHA I-IV                                                                                                                                                                                                      | All used specialised monitoring equipment, in the patient's home, connected via a phone line.                 | 10/13 – daily physiological monitoring (weight, HR, BP, ECG)<br>2/13 – daily body weight plus symptom monitoring<br>All transmitted to central healthcare professional (often nurse)                                                                                                                                                                                                        | Daily monitoring<br>Follow-up: 3-15 months                                                                                                                                                                       |

|                            |                                                                                                                                                                                                         |                                                                                      |                                                                                     |                                                                                                                                                       |                                                                                                                    |
|----------------------------|---------------------------------------------------------------------------------------------------------------------------------------------------------------------------------------------------------|--------------------------------------------------------------------------------------|-------------------------------------------------------------------------------------|-------------------------------------------------------------------------------------------------------------------------------------------------------|--------------------------------------------------------------------------------------------------------------------|
| <b>Garcia-Lizana 2007</b>  | Information communication technology (excluding telephone-only) for chronic disease management                                                                                                          | n.s.                                                                                 | 2/6 web based<br>2/6 videoconferencing<br>2/6 telemonitoring                        | 1/6 specified feedback<br>1/6 specific education focus                                                                                                | Follow-up: 6-15 months                                                                                             |
| <b>Inglis 2015</b>         | Telephone support - monitoring and/or self-care management delivered using telephone technology<br>Telemonitoring - digital/broadband /satellite/wireless or bluetooth transmission of physiologic data | 13192 participants<br>Mean age ranged 44.5 to 78 years<br>Mean male participants 64% | Community based home intervention by telephone or telemonitoring                    | 25.41 – structured telephone support including<br>18/41 – telemonitoring of vital signs, ECGs, weight.<br>2/41 – telephone support and telemonitoring | Follow-up 3-18 months<br>Intensity ranged from daily to weekly, with reducing frequency over time.                 |
| <b>Kujipers 2012</b>       | Web-based interventions for patient empowerment and physical activity                                                                                                                                   | Mean age 60 years (all conditions)                                                   | Web based – included online interaction with professional – usually study nurse     | Online support promoting self-management and physical activity programmes with peer support and professional feedback.                                | Duration 3 to 12 months.<br>Frequency and intensity “poorly reported in included studies”                          |
| <b>Radhakrishnan 2012</b>  | Telecommunication (excluding telephone only) with self-care outcomes                                                                                                                                    | n.s.                                                                                 | In most studies data review and patient interaction carried out by trial nurse      | Vital signs monitoring (5/8)<br>videoconferencing (4/8) and tailored education content through questions and answers (4/8).                           | Duration 6 weeks-12 months.<br>Follow-up similar duration.<br>6 week intervention had additional 4 month follow-up |
| <b>Schmidt 2010</b>        | Home telemonitoring<br>13/19 telephone monitoring<br>6/19 vital signs monitoring                                                                                                                        | n.s.                                                                                 | n.s.                                                                                | n.s.                                                                                                                                                  | n.s.                                                                                                               |
| <b>Asthma Reviews</b>      |                                                                                                                                                                                                         |                                                                                      |                                                                                     |                                                                                                                                                       |                                                                                                                    |
| <b>Berat-arrechea 2014</b> | Mobile health interventions                                                                                                                                                                             |                                                                                      | Limited to low- and middle-income countries.<br>All interventions delivered by SMS. | 1 RCT – mobile based self-management plan with interactive feedback.<br>1 RCT – Mobile monitoring of spirometry data with feedback.                   |                                                                                                                    |
| <b>De Jongh 2012</b>       | Mobile phone messaging for                                                                                                                                                                              | Moderate persistent asthma, mean age 24.6 (1 RCT)                                    | SMS                                                                                 | Participants submitted peak flow readings                                                                                                             | Daily self-monitoring results sent to central server.                                                              |

|                               |                                                                                                                                             |                                                                                                                                                                                        |                                                                                                                                                                                       |                                                                                                                                                                                                                                 |                                                                                                        |
|-------------------------------|---------------------------------------------------------------------------------------------------------------------------------------------|----------------------------------------------------------------------------------------------------------------------------------------------------------------------------------------|---------------------------------------------------------------------------------------------------------------------------------------------------------------------------------------|---------------------------------------------------------------------------------------------------------------------------------------------------------------------------------------------------------------------------------|--------------------------------------------------------------------------------------------------------|
|                               | facilitating self-management                                                                                                                |                                                                                                                                                                                        |                                                                                                                                                                                       | Content of feedback not specified                                                                                                                                                                                               | Weekly review by healthcare professional with personalized feedback and advice.                        |
| <b>Flodgren 2015</b>          | Telemedicine interventions grouped into <i>remote monitoring, store and forward applications, and interactive (real-time) telemedicine.</i> | 5 RCTs of asthma interventions<br>2 RCTs children only – mean age 10 in both<br>2 RCTs adults only, mean ages 28 and 32<br>One adults and children (mean ages 45 and 10, respectively) | 3 internet based interventions<br>1 computer based intervention involving camera and real time review<br>1 portable hand held data transmitting device with self-monitoring and input | All had educational focus and concerned review of clinical data with feedback                                                                                                                                                   | Follow-up 6-12 months<br>Data transfer weekly to fortnightly.                                          |
| <b>Garcia-Lizana 2007</b>     | Information communication technology (excluding telephone-only) for chronic disease management                                              | All children or adolescents with asthma                                                                                                                                                | 3/5 – interactive computer game<br>2/5 web based educational intervention                                                                                                             | All educational and interactive in focus                                                                                                                                                                                        | Follow-up: 3-15 months                                                                                 |
| <b>Jaana 2009</b>             | Home telemonitoring (transfer of clinical data from home to healthcare centre) for respiratory conditions                                   | Mean age 7.6 to 28 years                                                                                                                                                               | 5/7 used specialised equipment<br>3/7 utilised telephone connection<br>1/7 SMS<br>3/7 internet connection                                                                             | 7/7 evaluated asthma symptoms<br>6/7 assessed peak expiratory flow<br>5/7 symptom diary<br>3/7 evaluated medication use<br>3/7 assessed function status<br>1/7 spirometry values                                                | Duration 3 to 12 months<br>Frequency twice daily in one RCT, daily in 5 RCTs, twice weekly in one RCT. |
| <b>Krishna 2009</b>           | Delivery of health information or education by mobile phone or messaging                                                                    | Asthma                                                                                                                                                                                 | SMS only                                                                                                                                                                              | Peak flow monitoring and weekly medication adjustment                                                                                                                                                                           | Duration 4 months<br>Frequency: weekly                                                                 |
| <b>Marcano Belisario 2013</b> | Smartphone or tablet self-management apps for asthma                                                                                        | Asthma (although diagnostic criteria differed)<br>One RCT – aged 12 and over.<br>One RCT did not report age ranges.                                                                    | Asthma self-management smartphone apps compared to traditional, paper-based, asthma self-management<br>Outpatient setting                                                             | Data on symptoms, medication usage, peak expiratory flow etc. was recorded on app and transmitted intermittently to central server. Data then transmitted back along with control analysis and self-management recommendations. | Twice daily app usage in one study, other not specified.<br>3-6 month follow-up                        |
| <b>McLean 2010</b>            | Home telecare. Broad definition,                                                                                                            | Asthma                                                                                                                                                                                 | 9 RCTs – telephone interventions<br>2 RCTs – videoconferencing                                                                                                                        | Majority incorporated and initial face-to-face                                                                                                                                                                                  | Daily to 2 weekly contact.<br>3 to 18 month follow-up                                                  |

|                      |                                                                                                                                                                                      |                                                                                                                                                                               |                                                                                                                                                                                                |                                                                                                                                            |                                                                                  |
|----------------------|--------------------------------------------------------------------------------------------------------------------------------------------------------------------------------------|-------------------------------------------------------------------------------------------------------------------------------------------------------------------------------|------------------------------------------------------------------------------------------------------------------------------------------------------------------------------------------------|--------------------------------------------------------------------------------------------------------------------------------------------|----------------------------------------------------------------------------------|
|                      | included video, telephone or internet links with health professionals, wired or wireless transfer of patient data.                                                                   |                                                                                                                                                                               | 2 RCTs – Internet interventions<br>6 RCTs - other networked interventions<br>1 RCT – Text messaging<br>1 RCT – combination of text and internet                                                | introductory session followed by telemedicine follow-up which included symptoms monitoring, educational aspects and self-management plans. |                                                                                  |
| <b>COPD Reviews</b>  |                                                                                                                                                                                      |                                                                                                                                                                               |                                                                                                                                                                                                |                                                                                                                                            |                                                                                  |
| <b>Bolton 2011</b>   | Self- or carer-recorded physiological data<br>Transmission of data to healthcare provider using telecommunication (manual or automated)<br>Review of data with personalised feedback | 6 included studies<br>Only 1 RCT including educational component/self-management relevant to meta-review.<br>COPD – GOLD stage 3 or 4<br>55% female, mean age 67 years        | n.s.                                                                                                                                                                                           | 4/6 studies (1 RCT) included educational component                                                                                         | Daily completion of educational modules and transmission of data in relevant RCT |
| <b>Cruz 2014</b>     | Home telemonitoring – transmission of clinical data (physiological or symptoms) using information and communication technologies to be assessed by healthcare provider.              | Mean age >65<br>All studies included COPD severity in inclusion criteria.<br>4/7 moderate to severe COPD<br>3/7 severe to very severe COPD<br>and/or long term oxygen therapy | Home setting.<br>Self-recorded physiological data as well as monitoring of symptoms and exercise tolerance. Transmitted to healthcare professional using information communication technology. | n.s.                                                                                                                                       | Duration 2-12 months<br>Daily transmission                                       |
| <b>Flodgren 2015</b> | Telemedicine interventions grouped into <i>remote monitoring, store and forward applications, and interactive (real-time) telemedicine.</i>                                          | Mean age 60 to 68                                                                                                                                                             | 2 specifically designed monitoring devices (one hand-held, one home based).<br>One internet-based intervention.                                                                                | All had educational focus and concerned review of clinical data with feedback                                                              | Follow-up 6-12 months<br>Data transfer weekly to fortnightly.                    |
| <b>Franek 2012</b>   | Home telehealth technologies – self-recorded physiological                                                                                                                           | HTM:<br>3/5 specified severe COPD (and/or LTOT in one study)<br>Telephone support:                                                                                            | HTM:<br>Connected via landline<br>All included pulse oximetry plus other physiological recording equipment                                                                                     | HTM:<br>All included personalised feedback on symptom management                                                                           | HTM:<br>1-12 month intervention<br>No additional follow-up                       |

|                       |                                                                                                                                                                    |                                                                                                            |                                                                                                                   |                                                                                                                            |                                                                                                               |
|-----------------------|--------------------------------------------------------------------------------------------------------------------------------------------------------------------|------------------------------------------------------------------------------------------------------------|-------------------------------------------------------------------------------------------------------------------|----------------------------------------------------------------------------------------------------------------------------|---------------------------------------------------------------------------------------------------------------|
|                       | data transmitted to healthcare professional using ICT<br>Telephone only support – regular contact between patient and professional by telephone or videoconference | COPD patients discharged from a single hospital                                                            | including FEV1 monitor, pedometer, thermometer<br>Telephone support:<br>Delivered post discharge                  | 1/5 explicitly included self-management education<br>Telephone support:<br>Individualised post-discharge patient education | Telephone support:<br>18 day intervention, 15 day follow-up                                                   |
| <b>Kujipers 2012</b>  | Web-based interventions for patient empowerment and physical activity                                                                                              | Mean age 60 years (all conditions)                                                                         | Web based – included online interaction with professional – usually study nurse                                   | Online support promoting self-management and physical activity programmes with peer support and professional feedback.     | 12 months                                                                                                     |
| <b>Lundell 2015</b>   | Home-based telehealthcare incorporating feedback, counseling or motivational elements.                                                                             | Mean age ranged 64 to 73.                                                                                  | 5 telephone interventions<br>4 web based<br>3 mobile interventions                                                | Motivation or counseling elements of patient feedback common to all interventions included.                                | Feedback or motivation element at least 3 times in first months of intervention.<br>Up to 12 months follow-up |
| <b>McLean 2011</b>    | Home telecare. Broad definition, included video, telephone or internet links with health professionals, wired or wireless transfer of patient data.                | COPD<br>Classified as severe in 2 RCTs                                                                     | 3 telephone systems<br>3 internet delivery<br>3 videoconferencing<br>1 specialised independent network with video | Combination of educational self-management interventions combined with telemonitoring (2 RCTs) and home visits (2 RCTs)    | Follow-up 6 to 12 months                                                                                      |
| <b>Polisena 2010</b>  | Home telemonitoring (remote care delivery or monitoring) or telephone support (without electronic transmission of data)                                            | COPD<br>Mean age ranged 67 to 72<br>Male:female ratio ranged 50:46 to 87:3                                 | 4 telemonitoring<br>6 telephone support                                                                           | Follow-up 3 to 19 months                                                                                                   | Daily to weekly contact<br>3 to 15 month follow-up                                                            |
| <b>Cancer Reviews</b> |                                                                                                                                                                    |                                                                                                            |                                                                                                                   |                                                                                                                            |                                                                                                               |
| <b>Beatty 2013</b>    | Internet based self-help programmes                                                                                                                                | 1 RCT of 62 patients with breast cancer.<br>Mean age 52.5 and 50.3 (intervention and control respectively) | Web-based                                                                                                         | Internet delivered cognitive behavioural therapy with email prompts                                                        | 12 weeks duration                                                                                             |

|                  |                                                                                                                                                                                               |                                                                                                                                             |                                                           |                                                                                                                                                                                                                                                              |                                               |
|------------------|-----------------------------------------------------------------------------------------------------------------------------------------------------------------------------------------------|---------------------------------------------------------------------------------------------------------------------------------------------|-----------------------------------------------------------|--------------------------------------------------------------------------------------------------------------------------------------------------------------------------------------------------------------------------------------------------------------|-----------------------------------------------|
| Kujipers<br>2012 | Web-based interventions for patient empowerment and physical activity                                                                                                                         | 1 RCT – 325 patients with breast and prostate cancer                                                                                        | Web based – included online interaction with professional | Self-monitoring plus tailored self-management support<br>Communication with other patients and with expert nurses via internet                                                                                                                               | 12 months duration                            |
| McAlpine<br>2015 | Online interventions for cancer patients. Various types but separately considered those facilitating communication between clinician and patient (only these data considered for meta-review) | 2 RCT – various cancer types – 353 patients total<br>1 RCT – Lung cancer – 79 patients – mean age 60<br>1 RCT – Breast cancer. 252 patients | All web based delivery.                                   | One moderated internet based CBT programme.<br>One post-thoracotomy symptom monitoring programme incorporating telephone elements as well as online.<br>Two online information portal.<br>/educational interventions with online interaction with clinician. | Follow-up 9 months in one RCT, otherwise n.s. |
