# Supplementary material for: Telehealth Interventions to Support Self-Management of Long-Term Conditions: A Systematic Metareview of Diabetes, Heart Failure, Asthma, Chronic Obstructive Pulmonary Disease, and Cancer
Source: PubMed Central journal article supplement (PMC5451641; doi:10.2196/jmir.6688), 2017-05-17
Supplement: jmir_v19i5e172_app4.pdf [file jmir_v19i5e172_app4.pdf]

|                                   |   |   |   |   |   |   |   |   |   |   |   |    |
|-----------------------------------|---|---|---|---|---|---|---|---|---|---|---|----|
| Medical Advisory Secretariat 2009 | 3 | 4 | 4 | 2 | 3 | 4 | 4 | 4 | 4 | 1 | 3 | 36 |
| Montori 2004                      | 4 | 2 | 3 | 1 | 1 | 3 | 1 | 1 | 4 | 1 | 3 | 24 |
| Mushcab 2015                      | 4 | 4 | 4 | 1 | 1 | 4 | 1 | 1 | 1 | 1 | 3 | 25 |
| Polisena 2009                     | 4 | 4 | 4 | 4 | 2 | 4 | 4 | 4 | 4 | 1 | 3 | 38 |
| Polisena 2010                     | 3 | 4 | 3 | 3 | 2 | 4 | 4 | 4 | 4 | 1 | 3 | 35 |
| Radhakrishnan 2012                | 3 | 1 | 2 | 2 | 2 | 4 | 2 | 4 | 1 | 1 | 3 | 25 |
| Saffari 2014                      | 4 | 4 | 4 | 1 | 2 | 4 | 4 | 2 | 4 | 4 | 3 | 36 |
| Schmidt 2010                      | 3 | 1 | 4 | 2 | 1 | 4 | 2 | 2 | 1 | 1 | 3 | 24 |
| Small 2013                        | 4 | 4 | 3 | 2 | 1 | 4 | 4 | 4 | 4 | 1 | 3 | 34 |
| Suksomboon 2014                   | 4 | 4 | 4 | 1 | 2 | 4 | 4 | 2 | 4 | 4 | 3 | 36 |
| Sutcliffe 2011                    | 4 | 4 | 4 | 4 | 2 | 4 | 4 | 4 | 3 | 1 | 2 | 36 |
| Verhoeven 2007                    | 3 | 4 | 4 | 2 | 3 | 4 | 2 | 3 | 3 | 1 | 2 | 31 |
| Verhoeven 2010                    | 3 | 4 | 4 | 2 | 3 | 4 | 4 | 4 | 4 | 2 | 1 | 35 |
| Viana 2016                        | 4 | 4 | 4 | 2 | 1 | 4 | 4 | 4 | 4 | 1 | 3 | 35 |
| Wens 2008                         | 4 | 4 | 4 | 1 | 2 | 4 | 3 | 3 | 4 | 2 | 3 | 34 |
| Wu 2010                           | 4 | 4 | 4 | 1 | 2 | 4 | 4 | 3 | 4 | 4 | 4 | 38 |
| Zhai 2014                         | 3 | 4 | 4 | 2 | 3 | 4 | 4 | 3 | 4 | 4 | 3 | 38 |
