# Supplementary material for: Telehealth Interventions to Support Self-Management of Long-Term Conditions: A Systematic Metareview of Diabetes, Heart Failure, Asthma, Chronic Obstructive Pulmonary Disease, and Cancer
Source: PubMed Central journal article supplement (PMC5451641; doi:10.2196/jmir.6688), 2017-05-17
Supplement: jmir_v19i5e172_app5.pdf [file jmir_v19i5e172_app5.pdf]

## Details of Included Studies

| Author and year<br>RCTs/participants<br>R-AMSTAR<br>Disease group | R-AMSTAR<br>Explicit/Implied SM | Intervention<br>TH intervention<br>Focus and components                                                                                                                  | Results (Disease control)<br>Meta-reviews report summary<br>statistics Narrative syntheses:<br>denominator is number of<br>RCTs reporting outcome |
|-------------------------------------------------------------------|---------------------------------|--------------------------------------------------------------------------------------------------------------------------------------------------------------------------|---------------------------------------------------------------------------------------------------------------------------------------------------|
| <b>Diabetes Reviews</b>                                           |                                 |                                                                                                                                                                          |                                                                                                                                                   |
| <b>Type 1 Diabetes Reviews</b>                                    |                                 |                                                                                                                                                                          |                                                                                                                                                   |
| * <b>Baron 2012</b><br>[19]<br>2 RCTs, n=1303                     | R-AMSTAR = 28<br>Implied SM     | <b>TH:</b> Mobile TM of blood glucose<br>Focus: monitoring and provision<br>of action plan                                                                               | 0/2 RCTs showed a<br>significant improvement in<br>HbA1c                                                                                          |
| * <b>Currell</b><br>2000[23]<br>2 RCTs, n=148                     | R-AMSTAR = 38<br>Implied SM     | <b>TH:</b> Internet and telephone<br>interventions<br>Focus: monitoring and provision<br>of action plan                                                                  | 1/2 RCTs showed significant<br>improvement in HbA1c                                                                                               |
| ** <b>De Jongh</b><br>2012 [24]<br>2 RCTs, n = 130                | R-AMSTAR = 36<br>Explicit SM    | <b>TH:</b> Mobile phone messaging for<br>SM support<br>Information and education (n=1),<br>Adherence support (n=2)                                                       | Meta-analysis of HbA1c: no<br>significant improvement vs<br>control (MD -0.15%, 95%CI<br>-0.77 to 0.47)                                           |
| <b>Montori 2004</b><br>[41]<br>8 RCTs, n=391                      | R-AMSTAR = 24<br>Implied SM     | <b>TH:</b> TH facilitated<br>communication with professional<br>Focus: monitoring with action<br>plan                                                                    | Meta-analysis of HbA1c: no<br>significant difference vs usual<br>care (MD 0.2%, 95%CI -0.2 to<br>0.6%)                                            |
| * <b>Sutcliffe 2011</b><br>[48]<br>9 RCTs                         | R-AMSTAR = 36<br>Implied SM     | <b>TH:</b> TH aimed at improving<br>access and management of<br>young people with T1DM<br>Focus of SR was clinical review<br>and advice; psychological<br>support (n=2)  | 2/10 RCTs showed significant<br>improvement in HbA1c                                                                                              |
| ** <b>Viana 2016</b><br>[49]<br>6 RCTs, n=494                     | R-AMSTAR = 35<br>Explicit SM    | <b>TH:</b> Telemonitoring of blood<br>glucose and telephone support<br>Focus: adherence support;<br>information and education (n=2);<br>monitoring and action plan (n=4) | Meta-analysis of HbA1c: no<br>significant difference vs usual<br>care (MD -0.124, 95%CI<br>-0.268 to 0.020)                                       |
| <b>Type 2 Diabetes Reviews</b>                                    |                                 |                                                                                                                                                                          |                                                                                                                                                   |
| * <b>Baron 2012</b><br>[19]<br>10 RCTs, n=1303                    | R-AMSTAR = 28<br>Implied SM     | <b>TH:</b> Mobile TM of blood glucose<br>Focus: monitoring and provision<br>of action plan                                                                               | 6/10 RCTs showed a<br>significant improvement in<br>HbA1c                                                                                         |
| *** <b>Beatty 2013</b><br>[21]<br>5 RCTs, n=1627                  | R-AMSTAR = 31<br>Explicit SM    | <b>TH:</b> Internet based SM<br>Focus: lifestyle advice/support                                                                                                          | 0/4 RCTs showed a significant<br>improvement in HbA1c                                                                                             |
| ** <b>Cassimatis</b><br>2012 [22]<br>13 RCTs                      | R-AMSTAR = 26<br>Explicit SM    | <b>TH:</b> Behavioural support via<br>video/telephone support<br>Focus: lifestyle advice/support;<br>Adherence support (n=8)                                             | 4/13 RCTs showed a<br>significant improvement in<br>HbA1c                                                                                         |
| *** <b>Farmer 2016</b><br>[26]<br>11 RCTs, n=4820                 | R-AMSTAR = 37<br>Explicit SM    | <b>TH:</b> Messaging and/or<br>monitoring<br>Focus: adherence support                                                                                                    | Meta-analysis of impact on<br>adherence (5RCTs):<br>'moderate' effect, not<br>statistically significant                                           |
| ** <b>Graziano 2009</b><br>[29]<br>8 RCTs, n=2105                 | R-AMSTAR = 23<br>Explicit SM    | <b>TH:</b> Isolated telephone<br>interventions<br>Focus: information and<br>education and clinical review<br>with advice                                                 | 3/8 RCTs showed significant<br>reduction in HbA1c                                                                                                 |
| ** <b>Greenwood</b>                                               | R-AMSTAR = 21                   | <b>TH:</b> Remote TM to support self-                                                                                                                                    | HbA1c was improved in those                                                                                                                       |

|                                                                    |                              |                                                                                                                                                                   |                                                                                                                                                                                                                           |
|--------------------------------------------------------------------|------------------------------|-------------------------------------------------------------------------------------------------------------------------------------------------------------------|---------------------------------------------------------------------------------------------------------------------------------------------------------------------------------------------------------------------------|
| 2014 [30]<br>15 RCTs                                               | Explicit SM                  | monitoring of glucose<br>Focus: information and education; monitoring and action plan; clinical review and advice; and lifestyle advice/support                   | RCTs incorporating at least 5 of 7 pre-specified SM components. Greater reductions were seen in those with 6 of 7 components.                                                                                             |
| <b>** Medical Advisory Secretariat 2009 [42]</b><br>8 RCTs, n=2269 | R-AMSTAR = 36<br>Implied SM  | <b>TH:</b> Home telemonitoring<br>Focus: monitoring and action plan; lifestyle advice/support (n=7)                                                               | Meta-analysis of HbA1c: significant reduction vs usual care (MD -0.48%, 95%CI -0.70 to -0.26)                                                                                                                             |
| <b>* Mushcab 2015 [43]</b><br>9 RCTs                               | R-AMSTAR = 25<br>Explicit SM | <b>TH:</b> Web-based transmission of self-monitored blood glucose<br>Focus: monitoring and action plan                                                            | 4/9 RCTs showed significant reduction in HbA1c                                                                                                                                                                            |
| <b>** Safari 2014 [46]</b><br>10 RCTs, n=960                       | R-AMSTAR = 36<br>Explicit SM | <b>TH:</b> Mobile text-messaging<br>Focus: information and education                                                                                              | Meta-analysis of HbA1c: significant reduction vs control (MD -0.595%, 95% CI -0.833 to -0.356)                                                                                                                            |
| <b>** Wens 2008 [52]</b><br>2 RCTs                                 | R-AMSTAR = 34<br>Explicit SM | <b>TH:</b> TH mediated education interventions<br>Focus: information and education and adherence support                                                          | 1/2 showed a significant reduction in HbA1c                                                                                                                                                                               |
| <b>*** Wu 2010 [53]</b><br>7 RCTs, n=1764                          | R-AMSTAR = 38<br>Explicit SM | <b>TH:</b> Telephone follow-up<br>Monitoring and action plan (n=5); clinical review and advice (n=5); psychological support (n=2); lifestyle advice/support (n=2) | Meta-analysis of HbA1c: no significant difference vs usual care (MD -0.44%, 95%CI -0.93 to 0.06). Planned subgroup analysis of more intensive interventions showed significant improvement (MD -0.84% 95%CI -1.67 to 0.0) |
| <b>** Zhai 2014 [54]</b><br>35 RCTs                                | R-AMSTAR = 38<br>Implied SM  | <b>TH:</b> Home telemonitoring<br>Focus of SR was monitoring and action plan                                                                                      | Meta-analysis of HbA1c: significant reduction vs control (MD -0.37%, 95%CI -0.49% to -0.25%)                                                                                                                              |
| <b>Mixed Diabetes Reviews</b>                                      |                              |                                                                                                                                                                   |                                                                                                                                                                                                                           |
| <b>* Beratarrechea 2014 [20]</b><br>3 RCTs                         | R-AMSTAR = 31<br>Implied SM  | <b>TH:</b> Mobile interventions in developing countries<br>Information and education (n=2), monitoring and action plan (n=1)                                      | 2/3 RCTs showed a significant improvement in 'glycaemic control', but unclear how this was measured                                                                                                                       |
| <b>*** Farmer 2005 [25]</b><br>12 RCTs, n=1038                     | R-AMSTAR = 36<br>Explicit SM | <b>TH:</b> TM supporting blood glucose self-monitoring<br>Focus: monitoring and provision of action plan                                                          | Meta-analysis of HbA1c (9RCTs): No significant reduction in HbA1c vs control (MD -0.1%, 95%CI -0.4% to 0.04)                                                                                                              |
| <b>** Flodgren 2015 [27]</b><br>21 RCTs, n=3412                    | R-AMSTAR = 44<br>Implied SM  | <b>TH:</b> Interactive TH excluding telephone-only interventions<br>Focus: clinical review and advice; information and education (n=11)                           | Meta-analysis of HbA1c (16RCTs): Significant reduction vs usual care (MD -0.31, 95%CI -0.37 to -0.24)                                                                                                                     |
| <b>** Garzia-Lizana 2007 [28]</b>                                  | R-AMSTAR = 22<br>Explicit SM | <b>TH:</b> TH intervention excluding telephone-only                                                                                                               | 1/7 RCTs showed significant reduction in HbA1c                                                                                                                                                                            |

|                                                 |                              |                                                                                                                                                                                      |                                                                                                                                       |
|-------------------------------------------------|------------------------------|--------------------------------------------------------------------------------------------------------------------------------------------------------------------------------------|---------------------------------------------------------------------------------------------------------------------------------------|
| 7 RCTs, n=1044                                  |                              | Information and education (n=3);<br>Monitoring and action plan (n=4)                                                                                                                 |                                                                                                                                       |
| <b>** Hamine 2015 [31]</b><br>26 RCTs           | R-AMSTAR = 23<br>Explicit SM | <b>TH:</b> Mobile interventions<br>Focus of SR was medication adherence support                                                                                                      | 11/26 RCTs showed improved glycaemic control                                                                                          |
| <b>* Holtz 2012 [32]</b><br>7 RCTs, n=417       | R-AMSTAR = 22<br>Explicit SM | <b>TH:</b> Mobile interventions<br>Information and education (n=3);<br>monitoring and action plan (n=6)                                                                              | 2/7 RCTs showed a significant improvement in HbA1c                                                                                    |
| <b>** Huang 2015 [33]</b><br>18 RCTs, n=3798    | R-AMSTAR = 33<br>Implied SM  | <b>TH:</b> Transmission of self-monitored blood glucose<br>Focus: monitoring with action plan                                                                                        | Meta-analysis of HbA1c: significant reduction vs control (MD -0.54%, 95%CI -0.75 to -0.34)                                            |
| <b>* Jaana 2007 [34]</b><br>13 RCTs, n=889      | R-AMSTAR = 20<br>Implied SM  | <b>TH:</b> Home telemonitoring<br>Focus of SR was monitoring and action plan; lifestyle advice/support (n=3)                                                                         | 7/13 showed significant improvements in HbA1c                                                                                         |
| <b>** Kok 2011 [37]</b><br>9 RCTs, n=2223       | R-AMSTAR = 28<br>Explicit SM | <b>TH:</b> TH intervention for SM education<br>Focus: information and education; monitoring and action plan (n=4)                                                                    | 8/9 showed significant improvement in HbA1c (5 were intervention plus usual care, 4 were intervention in place of usual care)         |
| <b>* Krishna 2008 [35]</b><br>8 RCTs, n=271     | R-AMSTAR = 21<br>Explicit SM | <b>TH:</b> Mobile phone SM support<br>Focus of SR was information and education support and monitoring with action plan                                                              | 5/6 showed significant improvement in HbA1c<br>Intermediate outcomes reported as improved self-efficacy in 1/1 RCT                    |
| <b>* Krishna 2009 [36]</b><br>9 RCTs, n=331     | R-AMSTAR = 19<br>Explicit SM | <b>TH:</b> Mobile phone SM support and education<br>Focus of SR was information and education; monitoring and action plan (n=7); adherence support (n=7); and lifestyle advice (n=7) | 7/8 RCTs showed significant improvement in HbA1c                                                                                      |
| <b>*** Kujipers 2012 [16]</b><br>11 RCTs        | R-AMSTAR = 31<br>Explicit SM | <b>TH:</b> Web based interventions<br>Focus: psychological support and lifestyle advice/support                                                                                      | 3/6 RCTs showed significant improvement in self-efficacy                                                                              |
| <b>*** Liang 2011 [38]</b><br>11 RCTs<br>n=1060 | R-AMSTAR = 34<br>Explicit SM | <b>TH:</b> Mobile phone interventions<br>Focus of SR was lifestyle advice/support; "most studies" included monitoring and action plan                                                | Meta-analysis of HbA1c: significant reduction vs usual care (MD -0.5%, 95% CI -0.2 to -0.8%)<br>Effect more marked for T2DM than T1DM |
| <b>* Lieber 2014 [39]</b><br>5 RCTs             | R-AMSTAR = 22<br>Implied SM  | <b>TH:</b> TM of self-monitored blood glucose<br>Focus of SR was monitoring with action plan                                                                                         | 1/5 RCTs showed significant improvement in HbA1c                                                                                      |
| <b>** Marcolino 2013[40]</b><br>13 RCTs, n=4207 | R-AMSTAR = 39<br>Implied SM  | <b>TH:</b> TH facilitated communication with professional<br>Focus of SR was information and education and clinical review with advice                                               | Meta-analysis of HbA1c: significant reduction versus control (MD -0.44%, 95%CI -0.61 to -0.26%). Effect more marked for T1DM          |
| <b>** Polisena 2009 [44]</b>                    | Implied SM<br>R-AMSTAR = 38  | <b>TH:</b> Home TH (subdivided telemonitoring and telephone                                                                                                                          | Meta-analysis of HbA1c in home telemonitoring:                                                                                        |

|                                                    |                                 |                                                                                                                                                                                                        |                                                                                                                                                                                                                                                                                                                                                                      |
|----------------------------------------------------|---------------------------------|--------------------------------------------------------------------------------------------------------------------------------------------------------------------------------------------------------|----------------------------------------------------------------------------------------------------------------------------------------------------------------------------------------------------------------------------------------------------------------------------------------------------------------------------------------------------------------------|
| 16 RCTs, n=1671                                    |                                 | support)<br>Information and education (n=5),<br>monitoring and action plan<br>(n=13), lifestyle advice/support<br>(n=4)                                                                                | significant reduction vs usual<br>care (MD -0.21%, 95%CI<br>-0.35% to -0.08%)*                                                                                                                                                                                                                                                                                       |
| <b>*** Small 2013<br/>[45]</b><br>7 RCTs, n=1807   | R-AMSTAR = 34<br>Explicit SM    | <b>TH:</b> Telephone interventions<br>using peer support or “lay health<br>workers”<br>Focus of SR was information<br>and education; psychological<br>support (n=3), lifestyle<br>advice/support (n=4) | Meta-analysis of HbA1c:<br>significant reduction vs control<br>(MD -0.26, 95%CI -0.41 to<br>-0.11)                                                                                                                                                                                                                                                                   |
| <b>* Suksomboon<br/>2014 [47]</b><br>5 RCTs, n=953 | Implied SM<br>R-AMSTAR = 36     | <b>TH:</b> Telephone-only<br>interventions<br>Information and education (n=2),<br>Clinical review and advice (n=3),<br>Adherence support (n=3)                                                         | Meta-analysis of HbA1c: no<br>significant improvement vs<br>usual care (MD -0.38%,<br>95%CI -0.91 to 0.16)                                                                                                                                                                                                                                                           |
| <b>* Verhoeven<br/>2007 [50]</b><br>11 RCTs        | R-AMSTAR = 31<br>Implied SM     | <b>TH:</b> Teleconsultation and<br>videoconferencing<br>Focus of SR was clinical review<br>and advice                                                                                                  | Meta-analysis of HbA1c: no<br>significant reduction vs usual<br>care (MD 0.03%, 95%CI -0.31<br>to 0.24%)                                                                                                                                                                                                                                                             |
| <b>** Verhoeven<br/>2010 [51]</b><br>28 RCTs       | R-AMSTAR = 35<br><br>Implied SM | <b>TH:</b> Synchronous and<br>Asynchronous teleconsultation<br>Focus: clinical review and<br>advice                                                                                                    | Meta-analysis of HbA1c: no<br>significant reduction vs<br>controls (MD -0.10%, 95%CI<br>-0.39 to 0.18%)                                                                                                                                                                                                                                                              |
| <b>Heart Failure Reviews</b>                       |                                 |                                                                                                                                                                                                        |                                                                                                                                                                                                                                                                                                                                                                      |
| <b>* Beratarrechea<br/>2014 [20]</b><br>1 RCT      | R-AMSTAR = 31<br>Implied SM     | <b>TH:</b> Mobile phone interventions<br>in developing countries<br>Information and education (n=1),<br>lifestyle advice/support (n=1)                                                                 | Improved 6 minute walk test<br>in 1 RCT                                                                                                                                                                                                                                                                                                                              |
| <b>** Chaudhry<br/>2007 [55]</b><br>5 RCTs, n=2623 | R-AMSTAR = 34<br>Implied SM     | <b>TH:</b> any telemonitoring or<br>telephone intervention<br>Focus: information and<br>education and adherence<br>support                                                                             | 0/5 showed reduced mortality<br>vs control<br>3/5 showed reduced heart<br>failure hospitalisation<br>2/5 showed reduced all-cause<br>hospitalisation                                                                                                                                                                                                                 |
| <b>*** Ciere 2012<br/>[56]</b><br>11 RCTs          | R-AMSTAR = 31<br>Explicit SM    | <b>TH:</b> telehealth interventions<br>excluding telephone-only<br>Focus of SR was information<br>and education and monitoring<br>with action plans                                                    | Authors analysed evidence<br>linking interventions to<br>knowledge, self-care<br>behaviours, and self-efficacy.<br>Evidence was either lacking<br>or too ambiguous to draw<br>conclusions.                                                                                                                                                                           |
| <b>* Clarke 2011<br/>[57]</b><br>13 RCTs, n=3480   | R-AMSTAR = 27<br>Implied SM     | <b>TH:</b> telemonitoring using<br>specialised equipment<br>Focus: monitoring with action<br>plan and adherence support                                                                                | Meta-analyses: significant<br>reduction vs control in:<br>mortality (RR 0.77 (95% CI<br>0.61 to 0.97)) – primary<br>outcome, heart failure specific<br>hospital admission (RR 0.73<br>(95% CI 0.62-0.87))<br>No significant reduction in: all-<br>cause hospital admission (RR<br>0.99 (95% CI 0.88-1.11)),<br>emergency dept. visits<br>(RR1.04 (95% CI 0.86-1.26)) |

|                                                     |                              |                                                                                                                                                                                |                                                                                                                                                                                                                                                                                                                                                                                                     |
|-----------------------------------------------------|------------------------------|--------------------------------------------------------------------------------------------------------------------------------------------------------------------------------|-----------------------------------------------------------------------------------------------------------------------------------------------------------------------------------------------------------------------------------------------------------------------------------------------------------------------------------------------------------------------------------------------------|
| <b>** Garcia-Lizana 2007 [28]</b><br>6 RCTs, n=1086 | R-AMSTAR = 22<br>Explicit SM | <b>TH:</b> TH intervention excluding telephone-only information and education (n=1), monitoring and action plan (n=1), clinical review and advice (n=4)                        | 2/3 showed reduced mortality<br>1/2 showed reduced hospitalisations<br>2/2 showed reduced emergency dept. visits<br>2/3 showed improved treatment adherence                                                                                                                                                                                                                                         |
| <b>** Inglis 2015 [58]</b><br>41 RCTs, n=13192      | R-AMSTAR = 42<br>Implied SM  | <b>TH:</b> structured telephone support and physiological telemonitoring<br>Focus: monitoring and action plan and clinical review with advice; information and education (n=4) | Meta-analyses: both telemonitoring and telephone support reduced all-cause mortality (RR 0.80, 95%CI 0.68 to 0.94 and RR 0.87, 95% CI 0.77 to 0.98, respectively) and heart-failure hospitalisations (RR 0.71, 95% CI 0.60 to 0.83 and RR 0.87, 95% CI 0.77 to 0.98, respectively) but not all-cause hospitalisations (RR 0.95, 95% CI 0.90 to 1.00 and RR 0.95, 95% CI 0.89 to 1.01, respectively) |
| <b>** Kuijpers 2012 [16]</b><br>3 RCTs, n=165       | R-AMSTAR = 31<br>Explicit SM | <b>TH:</b> Web-based interventions<br>Focus: lifestyle advice and support                                                                                                      | 1/1 RCT showed improved self-care in both intervention and control groups, but with no significant difference<br>0/1 RCT showed improved self-efficacy                                                                                                                                                                                                                                              |
| <b>* Radhakrishnan 2012 [59]</b><br>8 RCTs, n=835   | R-AMSTAR = 25<br>Explicit SM | <b>TH:</b> Interactive telemonitoring or educational interventions<br>information and education (n=4), clinical review and advice (n=4)                                        | No sustained improvements in self-care in RCT data                                                                                                                                                                                                                                                                                                                                                  |
| <b>* Schmidt 2010 [60]</b><br>19 RCTs               | R-AMSTAR = 24<br>Implied SM  | <b>TH:</b> Home telemonitoring<br>Focus: monitoring with action plans                                                                                                          | 3/3 reported improved medication compliance with telemonitoring                                                                                                                                                                                                                                                                                                                                     |
| <b>Asthma Reviews</b>                               |                              |                                                                                                                                                                                |                                                                                                                                                                                                                                                                                                                                                                                                     |
| <b>* Beratarrechea 2014 [20]</b><br>2 RCTs          | R-AMSTAR = 31<br>Implied SM  | <b>TH:</b> Mobile phone interventions in developing countries<br>Monitoring and action plan (n=2)                                                                              | 1/1 RCT reported improved FEV1 and symptoms scores<br>1/1 RCT reported reduced hospitalisation and emergency dept. visits                                                                                                                                                                                                                                                                           |
| <b>** De Jongh 2012 [24]</b><br>1 RCT, n=16         | R-AMSTAR = 36<br>Explicit SM | <b>TH:</b> Mobile phone messaging interventions<br>Monitoring and action plan (n=1), adherence support (n=1)                                                                   | 1 RCT reported improvements in symptom score, hospital admissions and PEF variability.<br>Clinic visits higher in intervention group                                                                                                                                                                                                                                                                |
| <b>** Flodgren 2015 [27]</b><br>5 RCTs, n=825       | R-AMSTAR = 44<br>Explicit SM | <b>TH:</b> Interactive TH excluding telephone-only interventions<br>Focus of SR was clinical review and advice; information and education (n=5)                                | 0/4 showed improved symptom scores<br>0/3 showed improved spirometry tests<br>1/4 showed increased clinic visits in intervention group                                                                                                                                                                                                                                                              |
| <b>* Garcia-Lizana 2007 [28]</b>                    | R-AMSTAR = 22<br>Explicit SM | <b>TH:</b> TH interventions excluding telephone-only                                                                                                                           | 2/5 reported improved symptom scores                                                                                                                                                                                                                                                                                                                                                                |

|                                                        |                              |                                                                                                                                                        |                                                                                                                                                                                                                                                                                                                                                                                  |
|--------------------------------------------------------|------------------------------|--------------------------------------------------------------------------------------------------------------------------------------------------------|----------------------------------------------------------------------------------------------------------------------------------------------------------------------------------------------------------------------------------------------------------------------------------------------------------------------------------------------------------------------------------|
| 5RCTs, n=733                                           |                              | Information and education (n=5)                                                                                                                        | 2/4 reported reduced unscheduled healthcare utilisation                                                                                                                                                                                                                                                                                                                          |
| * <b>Jaana 2009 [61]</b><br>7 RCTs                     | R-AMSTAR = 22<br>Explicit SM | <b>TH:</b> Home telemonitoring<br>Monitoring and action plan (n=6); clinical review and advice (n=7); adherence support (n=3)                          | 5/7 reported improved symptoms                                                                                                                                                                                                                                                                                                                                                   |
| * <b>Krishna 2009 [36]</b><br>1 RCT, n=16              | R-AMSTAR = 21<br>Explicit SM | <b>TH:</b> Mobile phone messaging with educational focus<br>Focus of SR was clinical review and advice; education and information                      | 1/1 reported improved symptoms and reduced medication use                                                                                                                                                                                                                                                                                                                        |
| ** <b>Marcano Belisario 2013 [62]</b><br>2 RCTs, n=408 | R-AMSTAR = 39<br>Explicit SM | <b>TH:</b> Smartphone applications<br>Focus: monitoring and action plans                                                                               | 0/1 reported improved symptoms<br>1/2 reported improved health-related QOL<br>1/2 reported reduced emergency dept. visits<br>0/2 showed reduced hospital admissions                                                                                                                                                                                                              |
| ** <b>McLean 2010 [63]</b><br>21 RCTs, n=12038         | R-AMSTAR = 42<br>Implied SM  | <b>TH:</b> Home-based TH including telemonitoring and structured telephone support<br>Focus: monitoring and action plans and information and education | Meta-analyses: significant reduction versus control in hospitalisation after 12 months (OR 0.21 (95%CI 0.0 to 0.61)).<br>No significant reduction in emergency department visits or hospitalisation after 3 months (OR 1.16 (95%CI 0.52 to 2.58) and 0.47 (95%CI 0.01 to 36.46), respectively).<br>Improvement in health-related QOL was below clinically significant threshold. |
| <b>COPD Reviews</b>                                    |                              |                                                                                                                                                        |                                                                                                                                                                                                                                                                                                                                                                                  |
| * <b>Bolton 2011 [64]</b><br>2 RCTs, n=139             | R-AMSTAR = 32<br>Implied SM  | <b>TH:</b> Interactive physiological telemonitoring<br>Focus: monitoring and action plan; information and education (n=1)                              | 1/1 reported improved QOL (St George's Respiratory Questionnaire)<br>1/1 reported fewer hospital admissions and emergency dept. visits<br>No significant reduction in exacerbation frequency                                                                                                                                                                                     |
| * <b>Cruz 2014 [65]</b><br>7 RCTs, n=392               | R-AMSTAR = 36<br>Implied SM  | <b>TH:</b> Home telemonitoring<br>Focus: monitoring with action plan                                                                                   | Meta analyses: statistically significant improvement vs control in hospitalisation rate (– RR 0.72 (95%CI 0.53 to 0.98)) and QOL using SGRQ (SMD -0.53 (95%CI -0.97 to -0.09))<br>No significant difference in mean number of hospitalisations (SMD -0.06 (95%CI -0.32 to 0.19))<br>emergency dept. visits (RR                                                                   |

|                                               |                              |                                                                                                                                                          |                                                                                                                                                                                                                                                                                        |
|-----------------------------------------------|------------------------------|----------------------------------------------------------------------------------------------------------------------------------------------------------|----------------------------------------------------------------------------------------------------------------------------------------------------------------------------------------------------------------------------------------------------------------------------------------|
|                                               |                              |                                                                                                                                                          | 0.68 (95%CI 0.38 to 1.18)) and mortality (RR=1.43, 95%CI 0.40-5.03)                                                                                                                                                                                                                    |
| <b>** Flodgren 2015 [27]</b><br>3 RCTs, n=130 | R-AMSTAR = 44<br>Explicit SM | <b>TH:</b> Interactive TH excluding telephone-only interventions<br>Focus: clinical review and advice; information and education (n=3)                   | 1/1 reported no difference in healthcare utilisation<br>1/1 reported no difference in symptom score<br>1/1 reported improved health related QOL                                                                                                                                        |
| <b>* Franek 2012 [66]</b><br>6 RCTs, n=310    | R-AMSTAR = 33<br>Implied SM  | <b>TH:</b> Home telemonitoring and telephone-only support<br>Focus: monitoring and action plan; information and education (n=2)                          | 2/6 reported reduced hospitalisation<br>1/3 reported reduced emergency dept. visits<br>2/2 reported improved health related QOL<br>0/1 reported improved mortality<br>0/1 reported reduced exacerbations<br>1/1 reported improved self-efficacy                                        |
| <b>** Kuijpers 2012 [16]</b><br>2 RCTs        | R-AMSTAR = 31<br>Explicit SM | <b>TH:</b> Internet-based interventions<br>Focus: lifestyle advice/support; psychological support (n=1)                                                  | 1/2 reported significant improvement in self-efficacy                                                                                                                                                                                                                                  |
| <b>** Lundell 2015 [67]</b><br>9 RCTs, n=982  | R-AMSTAR = 39<br>Explicit SM | <b>TH:</b> Interactive telemonitoring or counselling<br>Focus: clinical review and advice                                                                | Meta-analyses: significant improvement vs control in time spent physically active (MD 64.7mins, 95%CI 54.4 to 74.9)<br>No significant difference in exercise tolerance (MD 1.3 m (95% CI -8.1 to 5.5)) and dyspnoea score (MD 0.088 (95% CI 0.056 to 0.233))                           |
| <b>** McLean 2011 [68]</b><br>10 RCTs, n=1004 | R-AMSTAR = 43<br>Implied SM  | <b>TH:</b> Home-based TH including telemonitoring and structured telephone support<br>Focus: monitoring and action plan; information and education (n=4) | Meta-analyses: significant reduction vs control in hospitalisations (OR 0.27 (95% CI 0.11 to 0.66)) and emergency dept. visits OR 0.46 (95%CI 0.33 to 0.65)<br>No significant difference in mortality (OR 1.05 (95%CI 0.63 to 1.75)) or QOL (MD in SGRQ. -6.57 (95%CI -13.62 to 0.48)) |
| <b>* Polisena 2010 [69]</b><br>7 RCTs, n=697  | R-AMSTAR = 35<br>Implied SM  | <b>TH:</b> Home telemonitoring and telephone support<br>Focus: monitoring with action plan                                                               | Meta-analysis: no significant difference in mortality between telephone support and control (RR 1.07 (95% CI 0.70 to 1.62))*<br>No overall improvement in QOL with home telemonitoring<br>With telephone support 5/5 reported fewer                                                    |

|                                                                                                                                                                                                                                                                                                                                                                                                             |                             |                                                                                                               |                                                                   |
|-------------------------------------------------------------------------------------------------------------------------------------------------------------------------------------------------------------------------------------------------------------------------------------------------------------------------------------------------------------------------------------------------------------|-----------------------------|---------------------------------------------------------------------------------------------------------------|-------------------------------------------------------------------|
|                                                                                                                                                                                                                                                                                                                                                                                                             |                             |                                                                                                               | hospitalisations and 4/4 reported fewer emergency dept. visits    |
| <b>Cancer Reviews</b>                                                                                                                                                                                                                                                                                                                                                                                       |                             |                                                                                                               |                                                                   |
| <b>** Beatty 2013 [21]</b><br>1 RCT, n=62<br>Breast cancer                                                                                                                                                                                                                                                                                                                                                  | R-AMSTAR=31<br>Explicit SM  | <b>TH:</b> Moderated internet-based self-help<br>Focus: lifestyle advice/support; psychological support (n=1) | 0/1 showed improvements in QOL or 'emotional wellbeing'           |
| <b>**Kuijpers 2012 [16]</b><br>1 RCT, n=325<br>Breast cancer and prostate cancer                                                                                                                                                                                                                                                                                                                            | R-AMSTAR=31<br>Explicit SM  | <b>TH:</b> Internet-based interventions<br>Focus: lifestyle advice/support                                    | No significant improvement in patient empowerment                 |
| <b>* McAlpine 2015 [70]</b><br>4 RCTs<br>Cancer (lung n=1, breast n=1, various n=2)                                                                                                                                                                                                                                                                                                                         | R-AMSTAR= 29<br>Explicit SM | <b>TH:</b> Online education programmes linking patient with clinician<br>Focus: information and education     | 0/2 reported improved QOL<br>1/2 reported improved symptom scores |
| <b>Abbreviations</b><br>CI – confidence interval; COPD – Chronic Obstructive Pulmonary Disease; DM- diabetes mellitus; HF – heart failure; MD – mean difference; PEF – Peak expiratory flow; RCT – randomised controlled trial; RR – Relative risk; SGRQ - St George's Respiratory Questionnaire; SR – Systematic review; T1DM – type 1 diabetes mellitus; T2DM – type 2 diabetes mellitus; TH – Telehealth |                             |                                                                                                               |                                                                   |
| *The risk ratio was originally published as 1.21 (95%CI 0.84 to 1.75), however this was shown to have been the result of an error which was subsequently identified and corrected[71, 72].                                                                                                                                                                                                                  |                             |                                                                                                               |                                                                   |
