# Supplementary material for: Telehealth Interventions to Support Self-Management of Long-Term Conditions: A Systematic Metareview of Diabetes, Heart Failure, Asthma, Chronic Obstructive Pulmonary Disease, and Cancer
Source: PubMed Central journal article supplement (PMC5451641; doi:10.2196/jmir.6688), 2017-05-17
Supplement: jmir_v19i5e172_app6.pdf [file jmir_v19i5e172_app6.pdf]

| <b>Author and year</b><br>RCTs/participants<br>R-AMSTAR<br>Disease group      | <b>Intervention</b><br>TH intervention<br>SM focus and components                                                                                                   | <b>Results</b><br>Meta-reviews report summary statistics<br>Narrative syntheses: denominator is<br>number of RCTs reporting outcome                                                                        | <b>Harvest plot decision</b><br><i>Any important quality concerns</i><br>([SR] = Systematic review author,<br>[MR] = Meta-review author)                                                                                 |
|-------------------------------------------------------------------------------|---------------------------------------------------------------------------------------------------------------------------------------------------------------------|------------------------------------------------------------------------------------------------------------------------------------------------------------------------------------------------------------|--------------------------------------------------------------------------------------------------------------------------------------------------------------------------------------------------------------------------|
| <b>Diabetes Reviews</b>                                                       |                                                                                                                                                                     |                                                                                                                                                                                                            |                                                                                                                                                                                                                          |
| * <b>Baron 2012</b><br>12 RCTs, n=1303<br>R-AMSTAR = 28<br>T1DM and T2DM      | <b>TH:</b> Mobile TM of blood glucose<br><b>Implied SM:</b> Focus of SR was monitoring and provision of action plan                                                 | T1DM: 0/2 RCTs showed a significant improvement in HbA1c<br>T2DM: 6/10 RCTs showed a significant improvement in HbA1c                                                                                      | <b>T1DM:</b> illustrated as neutral<br><b>T2DM:</b> Illustrated as positive (hatched)<br><i>Evidence inconsistent.[SR]</i><br><i>Publication bias not assessed [MR]</i>                                                  |
| *** <b>Beatty 2013</b><br>5 RCTs, n=1627<br>R-AMSTAR = 31<br>T2DM             | <b>TH:</b> Internet based SM<br><b>Explicit SM:</b> Focus of SR was lifestyle advice/support                                                                        | 0/4 RCTs showed a significant improvement in HbA1c<br>Intermediate outcomes reported as improved: diet in 2/5; activity in 1/5; self-efficacy in 1/5                                                       | <b>T2DM:</b> illustrated as neutral<br><i>Effect size of primary outcomes not assessed [MR]</i>                                                                                                                          |
| * <b>Beratarrechea 2014</b><br>3 RCTs<br>R-AMSTAR = 31<br>DM 1and2            | <b>TH:</b> Mobile interventions in developing countries<br><b>Implied SM:</b> Information and education (n=2), monitoring and action plan (n=1)                     | 2/3 RCTs showed a significant improvement in 'glycaemic control', but unclear how this was measured                                                                                                        | <b>Excluded</b> – unclear if HbA1c<br><br><i>Publication bias not assessed [MR]</i>                                                                                                                                      |
| ** <b>Cassimatis 2012</b><br>13 RCTs<br>R-AMSTAR = 26<br>DM 1and2             | <b>TH:</b> Behavioural support via video/telephone support<br><b>Explicit SM:</b> Focus of SR was lifestyle advice/support; Adherence support (n=8)                 | 4/13 RCTs showed a significant improvement in HbA1c<br>Intermediate outcomes reported as improved: diet in 5/8; activity in 5/8; self-care in 3/13; medication adherence in 3/8                            | <b>T1/2DM:</b> illustrated as neutral<br><i>2/13 reported relationships between intervention intensity and outcomes; both showed greater improvement with more substantial intervention [SR]</i>                         |
| * <b>Currell 2000</b><br>2 RCTs,n=148<br>R-AMSTAR = 38<br>T1DM                | <b>TH:</b> Internet and telephone interventions<br><b>Implied SM:</b> Focus of SR was monitoring and provision of action plan                                       | 1/2 RCTs showed significant improvement in HbA1c<br>Intermediate outcomes reported as decreased family problem-solving in 1 RCT                                                                            | <b>T1DM:</b> illustrated as neutral<br><i>Relatively old review – interventions in early stages and in development. Evidence likely to have been superseded.[MR]</i>                                                     |
| ** <b>De Jongh 2012</b><br>2 RCTs, n = 130<br>R-AMSTAR = 36<br>T1DM           | <b>TH:</b> Mobile phone messaging for SM support<br><b>Explicit SM:</b> Information and education (n=1), Adherence support (n=2)                                    | Meta-analysis of HbA1c: no significant improvement vs control (MD -0.15%, 95%CI -0.77 to 0.47)<br>Intermediate outcomes: No change in complications in 1 RCT, no change in healthcare utilisation in 1 RCT | <b>T1DM:</b> illustrated as neutral<br><i>Most studies provided insufficient information to assess the risk of bias.[SR]</i>                                                                                             |
| *** <b>Farmer 2005</b><br>12 RCTs, n=1038<br>R-AMSTAR = 36<br>DM 1 and 2      | <b>TH:</b> TM supporting blood glucose self-monitoring<br><b>Explicit SM:</b> Focus of SR was monitoring and provision of action plan                               | Meta-analysis of HbA1c (9RCTs): No significant reduction in HbA1c vs control (MD -0.1%, 95%CI -0.4% to 0.04)<br>Intermediate outcomes: no difference in healthcare utilisation                             | <b>T1/2DM:</b> illustrated as neutral<br><i>Review authors highlight poor description of trial methodologies [SR]</i>                                                                                                    |
| *** <b>Farmer 2016</b><br>11 RCTs, n=4820<br>R-AMSTAR = 37<br>T2DM            | <b>TH:</b> Messaging and/or monitoring<br><b>Explicit SM:</b> Focus of SR was adherence support                                                                     | Meta-analysis of impact on adherence (5RCTs): 'moderate' effect, not statistically significant<br>Narrative synthesis: improved adherence in 6/15 interventions                                            | <b>Excluded</b> – no control outcomes<br><i>Self-reported measures of adherence may not be reliable. High risk of bias in "the majority of" included studies. [SR]</i>                                                   |
| ** <b>Flodgren 2015</b><br>21 RCTs, n=3412<br>R-AMSTAR = 44<br>DM 1 and 2     | <b>TH:</b> Interactive TH excluding telephone-only interventions<br><b>Implied SM:</b> Focus of SR was clinical review and advice; information and education (n=11) | Meta-analysis of HbA1c (16RCTs): Significant reduction vs usual care (MD -0.31, 95%CI -0.37 to -0.24)<br>Intermediate outcomes reported as improved: healthcare usage in 1/5                               | <b>T1/2DM:</b> illustrated as positive                                                                                                                                                                                   |
| ** <b>Garzia-Lizana 2007</b><br>7 RCTs, n=1044<br>R-AMSTAR = 22<br>DM 1 and 2 | <b>TH:</b> TH intervention excluding telephone-only<br><b>Explicit SM:</b> Information and education (n=3); Monitoring and action plan (n=4)                        | 1/7 RCTs showed significant reduction in HbA1c                                                                                                                                                             | <b>T1/2DM:</b> illustrated as neutral<br><i>High degree of heterogeneity. Reduction in intensity of interventions if used in clinical practice may change efficacy.[SR]</i><br><i>Publication bias not assessed [MR]</i> |

|                                                                                 |                                                                                                                                                                                                                           |                                                                                                                                                                                      |                                                                                                                                                                                                                                                                                                             |
|---------------------------------------------------------------------------------|---------------------------------------------------------------------------------------------------------------------------------------------------------------------------------------------------------------------------|--------------------------------------------------------------------------------------------------------------------------------------------------------------------------------------|-------------------------------------------------------------------------------------------------------------------------------------------------------------------------------------------------------------------------------------------------------------------------------------------------------------|
| <p><b>** Graziano 2009</b><br/>8 RCTs, n=2105<br/>R-AMSTAR = 23<br/>T2DM</p>    | <p><b>TH:</b> Isolated telephone interventions<br/><b>Explicit SM:</b> Focus of SR was information and education and clinical review with advice</p>                                                                      | <p>3/8 RCTs showed significant reduction in HbA1c</p>                                                                                                                                | <p><b>T2DM:</b> illustrated as neutral<br/><i>Authors acknowledge that the mediating role of self-management is not assessed in their review.[SR]</i><br/><i>Publication bias not assessed [MR]</i></p>                                                                                                     |
| <p><b>** Greenwood 2014</b><br/>15 RCTs<br/>R-AMSTAR = 21<br/>T2DM</p>          | <p><b>TH:</b> Remote TM to support self-monitoring of glucose<br/><b>Explicit SM:</b> Focus of SR was information and education; monitoring and action plan; clinical review and advice; and lifestyle advice/support</p> | <p>HbA1c was improved in those RCTs incorporating at least 5 of 7 pre-specified SM components. Greater reductions were seen in those with 6 of 7 components.</p>                     | <p><b>T2DM:</b> illustrated as positive (hatched)<br/><i>Included participants with T2DM using insulin, for whom effects of titration may not truly reflect behaviour change. [SR]</i><br/><i>No quality assessment used.[MR]</i></p>                                                                       |
| <p><b>** Hamine 2015</b><br/>26 RCTs<br/>R-AMSTAR = 23<br/>DM 1 and 2</p>       | <p><b>TH:</b> Mobile interventions<br/><b>Explicit SM:</b> Focus of SR was medication adherence support</p>                                                                                                               | <p>11/26 RCTs showed improved glycaemic control<br/>Intermediate outcomes reported as improved adherence in 7/13 RCTs</p>                                                            | <p><b>T1/2DM:</b> illustrated as neutral<br/><i>Limitation of self-reported measures of adherence. Little evidence of theoretical frameworks. [SR]</i><br/><i>Publication bias not assessed [MR]</i></p>                                                                                                    |
| <p><b>* Holtz 2012</b><br/>7 RCTs, n=417<br/>R-AMSTAR = 22<br/>DM 1 and 2</p>   | <p><b>TH:</b> Mobile interventions<br/><b>Explicit SM:</b> Information and education (n=3); monitoring and action plan (n=6)</p>                                                                                          | <p>2/7 RCTs showed a significant improvement in HbA1c<br/>Intermediate outcomes reported as 'modest' improvements in knowledge and self-efficacy in a 'small proportion' of RCTs</p> | <p><b>T1/2DM:</b> illustrated as neutral<br/><i>Small sample sizes.[SR]</i><br/><i>Diversity of outcomes considered at a general level without further analysis of some specific outcomes. Publication bias not assessed [MR]</i></p>                                                                       |
| <p><b>** Huang 2015</b><br/>18 RCTs, n=3798<br/>R-AMSTAR = 33<br/>T2DM</p>      | <p><b>TH:</b> Transmission of self-monitored blood glucose<br/><b>Implied SM:</b> Focus of SR was monitoring with action plan</p>                                                                                         | <p>Meta-analysis of HbA1c: significant reduction vs control (MD -0.54%, 95%CI -0.75 to -0.34)</p>                                                                                    | <p><b>T2DM:</b> illustrated as positive<br/><i>Limited detail provided of included studied [MR]</i></p>                                                                                                                                                                                                     |
| <p><b>* Jaana 2007</b><br/>13 RCTs, n=889<br/>R-AMSTAR = 20<br/>DM 1 and 2</p>  | <p><b>TH:</b> Home telemonitoring<br/><b>Implied SM:</b> Focus of SR was monitoring and action plan; lifestyle advice/support (n=3)</p>                                                                                   | <p>7/13 showed significant improvements in HbA1c<br/>Intermediate outcomes reported as improved knowledge or self-care in 6/13</p>                                                   | <p><b>T1/2DM:</b> illustrated as positive (hatched)<br/><i>Heterogeneity of patient populations and outcomes measures limit generalisability [SR]</i><br/><i>No quality assessment, Publication bias not assessed [MR]</i></p>                                                                              |
| <p><b>** Kok 2011</b><br/>9 RCTs, n=2223<br/>R-AMSTAR = 28<br/>DM 1 and 2</p>   | <p><b>TH:</b> TH intervention for SM education<br/><b>Explicit SM:</b> Focus of SR was information and education; monitoring and action plan (n=4)</p>                                                                    | <p>8/9 showed significant improvement in HbA1c (5 were intervention plus usual care, 4 were intervention in place of usual care)</p>                                                 | <p><b>T1/2DM:</b> illustrated as positive<br/><i>"evidence not fully convincing because of limited number of studies available and the methodological limitations"[SR].</i><br/><i>Publication bias not assessed [MR]</i></p>                                                                               |
| <p><b>* Krishna 2008</b><br/>8 RCTs, n=271<br/>R-AMSTAR = 21<br/>DM 1 and 2</p> | <p><b>TH:</b> Mobile phone SM support<br/><b>Explicit SM:</b> Focus of SR was information and education support and monitoring with action plan</p>                                                                       | <p>5/6 showed significant improvement in HbA1c<br/>Intermediate outcomes reported as improved self-efficacy in 1/1 RCT</p>                                                           | <p><b>T1/2DM:</b> illustrated as positive<br/><i>Study heterogeneity. Concern about reliability of patient entered data. Small short-term statistically significant, changes in HbA1c may not be clinically significance [SR].</i><br/><i>No quality assessment. Publication bias not assessed [MR]</i></p> |
| <p><b>* Krishna 2009</b><br/>9 RCTs, n=331<br/>R-AMSTAR = 19<br/>DM 1 and 2</p> | <p><b>TH:</b> Mobile phone SM support and education<br/><b>Explicit SM:</b> Focus of SR was information and education; monitoring and action plan (n=7); adherence support (n=7); and lifestyle</p>                       | <p>7/8 RCTs showed significant improvement in HbA1c<br/>Intermediate outcomes reported as improved insulin adherence in 1/1 RCT</p>                                                  | <p><b>T1/2DM:</b> illustrated as positive<br/><i>Small sample sizes. Lack of cost information [SR]. No quality assessment. Publication bias not assessed [MR]</i></p>                                                                                                                                       |

|                                                                                        |                                                                                                                                                                                               |                                                                                                                                                                                                                                                      |                                                                                                                                                                                                                |
|----------------------------------------------------------------------------------------|-----------------------------------------------------------------------------------------------------------------------------------------------------------------------------------------------|------------------------------------------------------------------------------------------------------------------------------------------------------------------------------------------------------------------------------------------------------|----------------------------------------------------------------------------------------------------------------------------------------------------------------------------------------------------------------|
|                                                                                        | advice (n=7)                                                                                                                                                                                  |                                                                                                                                                                                                                                                      |                                                                                                                                                                                                                |
| <b>*** Kujipers 2012</b><br>11 RCTs<br>R-AMSTAR = 31<br>DM 1 and 2                     | <b>TH:</b> Web based intervention                                                                                                                                                             | 3/6 RCTs showed significant improvement in self-efficacy                                                                                                                                                                                             | <b>Excluded:</b> no control outcome<br><i>Limited description of methods in primary studies including randomisation process [SR].<br/>Publication bias not assessed [MR]</i>                                   |
| <b>*** Liang 2011</b><br>11 RCTs<br>n=1060<br>R-AMSTAR = 34<br>DM 1 and 2              | <b>TH:</b> Mobile phone interventions<br><b>Explicit SM:</b> Focus of SR was lifestyle advice/support; "most studies" included monitoring and action plan                                     | Meta-analysis of HbA1c: significant reduction vs usual care (MD -0.5%, 95% CI -0.2 to -0.8%)<br>Effect more marked for T2DM than T1DM                                                                                                                | <b>T1/2DM:</b> illustrated as positive<br><i>Smaller trials showed greater effect – possible publication bias.[SR]</i>                                                                                         |
| <b>* Lieber 2014</b><br>5 RCTs<br>R-AMSTAR = 22<br>DM 1 and 2                          | <b>TH:</b> TM of self-monitored blood glucose<br><b>Implied SM:</b> Focus of SR was monitoring with action plan                                                                               | 1/5 RCTs showed significant improvement in HbA1c                                                                                                                                                                                                     | <b>T1/2DM:</b> illustrated as neutral<br><i>Considerable heterogeneity between studies.[SR] No quality assessment. Publication bias not assessed [MR]</i>                                                      |
| <b>** Marcolino 2013</b><br>13 RCTs, n=4207<br>R-AMSTAR = 39<br>DM 1 and 2             | <b>TH:</b> TH facilitated communication with professional<br><b>Implied SM:</b> Focus of SR was information and education and clinical review with advice                                     | Meta-analysis of HbA1c: significant reduction versus control (MD -0.44%, 95%CI -0.61 to -0.26%). Effect more marked for T1DM<br>Secondary outcomes reported as significant reductions in blood pressure (systolic and diastolic) and LDL cholesterol | <b>T1/2DM:</b> illustrated as positive<br><i>May reflect different self-management strategies, or be confounded by age of participants and design/acceptability of telehealth intervention [SR]</i>            |
| <b>Montori 2004</b><br>8 RCTs, n=391<br>R-AMSTAR = 24<br>T1DM                          | <b>TH:</b> TH facilitated communication with professional<br><b>Implied SM:</b> Focus of SR was monitoring with action plan                                                                   | Meta-analysis of HbA1c: no significant difference vs usual care (MD 0.2%, 95%CI -0.2 to 0.6%)                                                                                                                                                        | <b>T1DM:</b> illustrated as neutral<br><i>Early meta-analysis: few participants in the included studies. Conclusions assume 'telecare' is a single homogenous intervention [MR].</i>                           |
| <b>** Medical Advisory Secretariat 2009</b><br>8 RCTs, n=2269<br>R-AMSTAR = 36<br>T2DM | <b>TH:</b> Home telemonitoring<br><b>Implied SM:</b> Focus of SR was monitoring and action plan; lifestyle advice/support (n=7)                                                               | Meta-analysis of HbA1c: significant reduction vs usual care (MD -0.48%, 95%CI -0.70 to -0.26)                                                                                                                                                        | <b>T2DM:</b> illustrated as positive<br><i>Possible confounding as content of intervention group training not clear. Significant heterogeneity between studies.[SR]<br/>Publication bias not assessed [MR]</i> |
| <b>* Mushcab 2015</b><br>9 RCTs<br>R-AMSTAR = 25<br>T2DM                               | <b>TH:</b> Web-based transmission of self-monitored blood glucose<br><b>Explicit SM:</b> Focus of SR was monitoring and action plan                                                           | 4/9 RCTs showed significant reduction in HbA1c                                                                                                                                                                                                       | <b>T2DM:</b> illustrated as neutral<br><i>Publication bias not assessed [MR]</i>                                                                                                                               |
| <b>** Polisen 2009</b><br>16 RCTs, n=1671<br>R-AMSTAR = 38<br>DM 1 and 2               | <b>TH:</b> Home TH (subdivided telemonitoring and telephone support)<br><b>Implied SM:</b> Information and education (n=5), monitoring and action plan (n=13), lifestyle advice/support (n=4) | Meta-analysis of HbA1c in home telemonitoring: significant reduction vs usual care (MD -0.21%, 95%CI -0.35% to -0.08%)                                                                                                                               | <b>T1/2DM:</b> illustrated as positive<br><i>Poor methodological quality of included studies [SR].<br/>Publication bias not assessed [MR]</i>                                                                  |
| <b>** Safari 2014</b><br>10 RCTs, n=960<br>R-AMSTAR = 36<br>T2DM                       | <b>TH:</b> Mobile text-messaging<br><b>Explicit SM:</b> Focus of SR was information and education                                                                                             | Meta-analysis of HbA1c: significant reduction vs control (MD -0.595%, 95% CI -0.833 to -0.356)                                                                                                                                                       | <b>T2DM:</b> illustrated as positive<br><i>Egger's analysis suggests high chance of publication bias[SR]</i>                                                                                                   |
| <b>*** Small 2013</b><br>7 RCTs, n=1807<br>R-AMSTAR = 34<br>DM 1 and 2                 | <b>TH:</b> Telephone interventions using peer support or "lay health workers"<br><b>Explicit SM:</b> Focus of SR was information and                                                          | Meta-analysis of HbA1c: significant reduction vs control (MD -0.26, 95%CI -0.41 to -0.11)<br>Intermediate outcomes reported as improved self-care behaviours in 4/4 RCTs                                                                             | <b>T1/2DM:</b> illustrated as positive<br><i>Publication bias not assessed [MR]</i>                                                                                                                            |

|                                                                          |                                                                                                                                                                                              |                                                                                                                                                                                                                                                                                                                                                                                                             |                                                                                                                                                                                                                                                    |
|--------------------------------------------------------------------------|----------------------------------------------------------------------------------------------------------------------------------------------------------------------------------------------|-------------------------------------------------------------------------------------------------------------------------------------------------------------------------------------------------------------------------------------------------------------------------------------------------------------------------------------------------------------------------------------------------------------|----------------------------------------------------------------------------------------------------------------------------------------------------------------------------------------------------------------------------------------------------|
|                                                                          | education; psychological support (n=3), lifestyle advice/support (n=4)                                                                                                                       |                                                                                                                                                                                                                                                                                                                                                                                                             |                                                                                                                                                                                                                                                    |
| <b>* Suksomboon 2014</b><br>5 RCTs, n=953<br>R-AMSTAR = 36<br>DM 1 and 2 | <b>TH:</b> Telephone-only interventions<br><b>Implied SM:</b> Information and education (n=2), Clinical review and advice (n=3), Adherence support (n=3)                                     | Meta-analysis of HbA1c: no significant improvement vs usual care (MD -0.38%, 95%CI -0.91 to 0.16)                                                                                                                                                                                                                                                                                                           | <b>T1/2DM:</b> illustrated as neutral<br><i>Variation in the contents and description of standard care in 5 trials. [SR] Studies in which active self-monitoring or medication adjustment by patients was part of the trial were excluded.[MR]</i> |
| <b>* Sutcliffe 2011</b><br>9 RCTs<br>R-AMSTAR = 36<br>T1DM               | <b>TH:</b> TH aimed at improving access and management of young people with T1DM<br><b>Implied SM:</b> Focus of SR was clinical review and advice; psychological support (n=2)               | 2/10 RCTs showed significant improvement in HbA1c<br>Intermediate outcomes reported as improved self-care in 2 RCTs                                                                                                                                                                                                                                                                                         | <b>T1DM:</b> illustrated as neutral<br><i>Breadth of study designs make magnitude of effects and effects on health difficult to determine. Little large scale high quality evidence identified. [SR]<br/>Publication bias not assessed [MR]</i>    |
| <b>** Viana 2016</b><br>6 RCTs, n=494<br>R-AMSTAR = 35<br>T1DM           | <b>TH:</b> Telemonitoring of blood glucose and telephone support<br><b>Explicit SM:</b> Focus of SR was adherence support; information and education (n=2); monitoring and action plan (n=4) | Meta-analysis of HbA1c: no significant difference vs usual care (MD -0.124, 95%CI -0.268 to 0.020)                                                                                                                                                                                                                                                                                                          | <b>T1DM:</b> illustrated as neutral<br><i>Publication bias not assessed [MR]</i>                                                                                                                                                                   |
| <b>* Verhoeven 2007</b><br>11 RCTs<br>R-AMSTAR = 31<br>DM 1 and 2        | <b>TH:</b> Teleconsultation and videoconferencing<br><b>Implied SM:</b> Focus of SR was clinical review and advice                                                                           | Meta-analysis of HbA1c: no significant reduction vs usual care (MD 0.03%, 95%CI -0.31 to 0.24%)                                                                                                                                                                                                                                                                                                             | <b>T1/2DM:</b> illustrated as neutral<br><i>Publication bias not assessed [MR]</i>                                                                                                                                                                 |
| <b>** Verhoeven 2010</b><br>28 RCTs<br>R-AMSTAR = 35<br>T1/2DM           | <b>TH:</b> Synchronous and Asynchronous teleconsultation<br><b>Implied SM:</b> Focus of SR was clinical review and advice                                                                    | Meta-analysis of HbA1c: no significant reduction vs controls (MD -0.10%, 95%CI -0.39 to 0.18%)                                                                                                                                                                                                                                                                                                              | <b>T1/2DM:</b> illustrated as neutral<br><i>Publication bias not assessed [MR]</i>                                                                                                                                                                 |
| <b>** Wens 2008</b><br>2 RCTs<br>R-AMSTAR = 34<br>T2DM                   | <b>TH:</b> TH mediated education interventions<br><b>Explicit SM:</b> Focus of review was information and education and adherence support                                                    | 1/2 showed a significant reduction in HbA1c                                                                                                                                                                                                                                                                                                                                                                 | <b>T2DM:</b> illustrated as neutral<br><i>Search completed in 2002 as was subgroup analysis of previous Cochrane review.[MR]</i>                                                                                                                   |
| <b>*** Wu 2010</b><br>7 RCTs, n=1764<br>R-AMSTAR = 38<br>T2DM            | <b>TH:</b> Telephone follow-up<br><b>Explicit SM:</b> Monitoring and action plan (n=5); clinical review and advice (n=5); psychological support (n=2); lifestyle advice/support (n=2)        | Meta-analysis of HbA1c: no significant difference vs usual care (MD -0.44%, 95%CI -0.93 to 0.06). Planned subgroup analysis of more intensive interventions showed significant improvement (MD -0.84% 95%CI -1.67 to 0.0)<br>Intermediate outcomes reported improved: BMI in 0/2, BP in 0/1, healthcare utilisation in 2/4, dietician attendance in 1/4, podiatrist attendance in 1/4, self-efficacy in 2/3 | <b>T2DM:</b> illustrated as neutral<br><i>Only analysed studies which reported mean difference in HbA1c. Secondary outcome analysis limited by differences in data availability.[SR]</i>                                                           |
| <b>** Zhai 2014</b><br>35 RCTs<br>R-AMSTAR = 38<br>T2DM                  | <b>TH:</b> Home telemonitoring<br><b>Implied SM:</b> Focus of SR was monitoring and action plan                                                                                              | Meta-analysis of HbA1c: significant reduction vs control (MD -0.37%, 95%CI -0.49% to -0.25%)                                                                                                                                                                                                                                                                                                                | <b>T2DM:</b> illustrated as positive<br><i>Heterogeneity in length of follow-up. Lack of blinding in included studies.[SR]</i>                                                                                                                     |
| <b>Heart Failure Reviews</b>                                             |                                                                                                                                                                                              |                                                                                                                                                                                                                                                                                                                                                                                                             |                                                                                                                                                                                                                                                    |
| <b>* Beratarrechea 2014</b>                                              | <b>TH:</b> Mobile phone interventions in developing                                                                                                                                          | Improved 6 minute walk test in 1 RCT                                                                                                                                                                                                                                                                                                                                                                        | <b>Excluded:</b> no control outcome<br><i>Publication bias not assessed [MR]</i>                                                                                                                                                                   |

|                                                                                  |                                                                                                                                                                                                            |                                                                                                                                                                                                                                                                                                                                                                                                     |                                                                                                                                                                                                                                               |
|----------------------------------------------------------------------------------|------------------------------------------------------------------------------------------------------------------------------------------------------------------------------------------------------------|-----------------------------------------------------------------------------------------------------------------------------------------------------------------------------------------------------------------------------------------------------------------------------------------------------------------------------------------------------------------------------------------------------|-----------------------------------------------------------------------------------------------------------------------------------------------------------------------------------------------------------------------------------------------|
| 1 RCT<br>R-AMSTAR = 31<br>Heart failure                                          | countries<br><b>Implied SM:</b> information and education (n=1), lifestyle advice/support (n=1)                                                                                                            |                                                                                                                                                                                                                                                                                                                                                                                                     |                                                                                                                                                                                                                                               |
| <b>** Chaudhry 2007</b><br>5 RCTs, n=2623<br>R-AMSTAR = 34<br>Heart failure      | <b>TH:</b> any telemonitoring or telephone intervention<br><b>Implied SM:</b> Focus of SR was information and education and adherence support                                                              | 0/5 showed reduced mortality vs control<br>3/5 showed reduced heart failure hospitalisation<br>2/5 showed reduced all-cause hospitalisation                                                                                                                                                                                                                                                         | <b>HF:</b> illustrated as neutral<br><i>Poor quality of data reporting in primary studies. High heterogeneity of interventions and technologies. [SR]</i><br><i>Publication bias not assessed [MR]</i>                                        |
| <b>*** Ciere 2012</b><br>11 RCTs<br>R-AMSTAR = 31<br>Heart failure               | <b>TH:</b> telehealth interventions excluding telephone-only<br><b>Explicit SM:</b> Focus of SR was information and education and monitoring with action plans                                             | Authors analysed evidence linking interventions to knowledge, self-care behaviours, and self-efficacy. Evidence was either lacking or too ambiguous to draw conclusions.                                                                                                                                                                                                                            | <b>Excluded:</b> no control outcome<br><i>Included study quality was generally poor with concerns relating to study power and blinding of assessors [SR]. Publication bias not assessed [MR]</i>                                              |
| <b>* Clarke 2011</b><br>13 RCTs, n=3480<br>R-AMSTAR = 27<br>Heart failure        | <b>TH:</b> telemonitoring using specialised equipment<br><b>Implied SM:</b> Focus of SR was monitoring with action plan and adherence support                                                              | Meta-analyses: significant reduction vs control in: mortality (RR 0.77 (95% CI 0.61 to 0.97)) – primary outcome, heart failure specific hospital admission (RR 0.73 (95% CI 0.62-0.87))<br>No significant reduction in: all-cause hospital admission (RR 0.99 (95% CI 0.88-1.11)), emergency dept. visits (RR 1.04 (95% CI 0.86-1.26))                                                              | <b>HF:</b> illustrated as positive<br><i>Significant heterogeneity of studies. [SR]</i><br><i>Little analysis of the role of self-management despite this being highlighted. No quality assessment. Publication bias not assessed [MR]</i>    |
| <b>** Garcia-Lizana 2007</b><br>6 RCTs, n=1086<br>R-AMSTAR = 22<br>Heart failure | <b>TH:</b> TH intervention excluding telephone-only<br><b>Explicit SM:</b> information and education (n=1), monitoring and action plan (n=1), clinical review and advice (n=4)                             | 2/3 showed reduced mortality<br>1/2 showed reduced hospitalisations<br>2/2 showed reduced emergency dept. visits<br>2/3 showed improved treatment adherence                                                                                                                                                                                                                                         | <b>HF:</b> illustrated as positive<br><i>Heterogeneity between interventions and technologies. Reduction in intensity of interventions if used in clinical practice may change efficacy.[SR]</i><br><i>Publication bias not assessed [MR]</i> |
| <b>** Inglis 2015</b><br>41 RCTs, n=13192<br>R-AMSTAR = 42<br>Heart failure      | <b>TH:</b> structured telephone support and physiological telemonitoring<br><b>Implied SM:</b> Focus of SR was monitoring and action plan and clinical review with advice; information and education (n=4) | Meta-analyses: both telemonitoring and telephone support reduced all-cause mortality (RR 0.80, 95%CI 0.68 to 0.94 and RR 0.87, 95% CI 0.77 to 0.98, respectively) and heart-failure hospitalisations (RR 0.71, 95% CI 0.60 to 0.83 and RR 0.87, 95% CI 0.77 to 0.98, respectively) but not all-cause hospitalisations (RR 0.95, 95% CI 0.90 to 1.00 and RR 0.95, 95% CI 0.89 to 1.01, respectively) | <b>HF:</b> illustrated as positive<br><i>Difficulty identifying outcomes from multiple publications[SR]</i>                                                                                                                                   |
| <b>** Kuijpers 2012</b><br>3 RCTs, n=165<br>R-AMSTAR = 31<br>Heart failure       | <b>TH:</b> Web-based interventions<br><b>Explicit SM:</b> Focus of SR was lifestyle advice and support                                                                                                     | 1/1 RCT showed improved self-care in both intervention and control groups, but with no significant difference<br>0/1 RCT showed improved self-efficacy                                                                                                                                                                                                                                              | <b>Excluded:</b> no control outcomes<br><i>Limited description of methods in primary studies including randomisation process.[SR]</i><br><i>Publication bias not assessed [MR]</i>                                                            |
| <b>* Radhakrishnan 2012</b><br>8 RCTs, n=835<br>R-AMSTAR = 25<br>Heart failure   | <b>TH:</b> Interactive telemonitoring or educational interventions<br><b>Explicit SM:</b> information and education (n=4), clinical review and advice (n=4)                                                | No sustained improvements in self-care in RCT data                                                                                                                                                                                                                                                                                                                                                  | <b>Excluded:</b> no control outcomes<br><i>Conclusion based on results of trials lacking control groups. No quality assessment. Publication bias not assessed [MR]</i>                                                                        |
| <b>* Schmidt 2010</b><br>19 RCTs<br>R-AMSTAR = 24<br>Heart failure               | <b>TH:</b> Home telemonitoring<br><b>Implied SM:</b> Focus of SR was monitoring with action plans                                                                                                          | 3/3 reported improved medication compliance with telemonitoring                                                                                                                                                                                                                                                                                                                                     | <b>Excluded:</b> no control outcomes<br><i>High heterogeneity in telemonitoring definitions and in nature of interventions.[SR]</i><br><i>Publication bias not assessed [MR]</i>                                                              |
| <b>Asthma Reviews</b>                                                            |                                                                                                                                                                                                            |                                                                                                                                                                                                                                                                                                                                                                                                     |                                                                                                                                                                                                                                               |
| <b>* Beratarrechea</b>                                                           | <b>TH:</b> Mobile phone                                                                                                                                                                                    | 1/1 RCT reported improved FEV1 and                                                                                                                                                                                                                                                                                                                                                                  | <b>Asthma:</b> illustrated as positive                                                                                                                                                                                                        |

|                                                                              |                                                                                                                                                                                    |                                                                                                                                                                                                                                                                                                                                                                                  |                                                                                                                                                                                                                                                   |
|------------------------------------------------------------------------------|------------------------------------------------------------------------------------------------------------------------------------------------------------------------------------|----------------------------------------------------------------------------------------------------------------------------------------------------------------------------------------------------------------------------------------------------------------------------------------------------------------------------------------------------------------------------------|---------------------------------------------------------------------------------------------------------------------------------------------------------------------------------------------------------------------------------------------------|
| <b>2014</b><br>2 RCTs<br>R-AMSTAR = 31<br>Asthma                             | interventions in developing countries<br><b>Implied SM:</b> Monitoring and action plan (n=2)                                                                                       | symptoms scores<br>1/1 RCT reported reduced hospitalisation and emergency dept. visits                                                                                                                                                                                                                                                                                           | <i>Publication bias not assessed [MR]</i>                                                                                                                                                                                                         |
| <b>** De Jongh 2012</b><br>1 RCT, n=16<br>R-AMSTAR = 36<br>Asthma            | <b>TH:</b> Mobile phone messaging interventions<br><b>Explicit SM:</b> Monitoring and action plan (n=1), adherence support (n=1)                                                   | 1 RCT reported improvements in symptom score, hospital admissions and PEF variability.<br>Clinic visits higher in intervention group                                                                                                                                                                                                                                             | <b>Asthma:</b> illustrated as positive “Extremely small sample size”.<br>Most studies provided insufficient information to assess the risk of bias.[SR]                                                                                           |
| <b>** Flodgren 2015</b><br>5 RCTs, n=825<br>R-AMSTAR = 44<br>Asthma          | <b>TH:</b> Interactive TH excluding telephone-only interventions<br><b>Explicit SM:</b> Focus of SR was clinical review and advice; information and education (n=5)                | 0/4 showed improved symptom scores<br>0/3 showed improved spirometry tests<br>1/4 showed increased clinic visits in intervention group                                                                                                                                                                                                                                           | <b>Asthma:</b> illustrated as neutral                                                                                                                                                                                                             |
| <b>* Garcia-Lizana 2007</b><br>5RCTs, n=733<br>R-AMSTAR = 22<br>Asthma       | <b>TH:</b> TH interventions excluding telephone-only<br><b>Explicit SM:</b> Information and education (n=5)                                                                        | 2/5 reported improved symptom scores<br>2/4 reported reduced unscheduled healthcare utilisation                                                                                                                                                                                                                                                                                  | <b>Asthma:</b> illustrated as neutral<br>High degree of heterogeneity between interventions and technologies. Reduction in intensity of interventions if used in clinical practice may change efficacy.[SR]<br>Publication bias not assessed [MR] |
| <b>* Jaana 2009</b><br>7 RCTs<br>R-AMSTAR = 22<br>Asthma                     | <b>TH:</b> Home telemonitoring<br><b>Explicit SM:</b> Monitoring and action plan (n=6); clinical review and advice (n=7); adherence support (n=3)                                  | 5/7 reported improved symptoms<br>No consistent evidence of reduced healthcare utilisation (all respiratory conditions)                                                                                                                                                                                                                                                          | <b>Asthma:</b> illustrated as positive<br>Limited detail on systematic review methodology. Publication bias not assessed [MR]                                                                                                                     |
| <b>* Krishna 2009</b><br>1 RCT, n=16<br>R-AMSTAR = 21<br>Asthma              | <b>TH:</b> Mobile phone messaging with educational focus<br><b>Explicit SM:</b> Focus of SR was clinical review and advice; education and information                              | 1/1 reported improved symptoms and reduced medication use                                                                                                                                                                                                                                                                                                                        | <b>Asthma:</b> illustrated as positive<br>Only one RCT, very small sample size. Publication bias not assessed [MR]                                                                                                                                |
| <b>** Marcano Belisario 2013</b><br>2 RCTs, n=408<br>R-AMSTAR = 39<br>Asthma | <b>TH:</b> Smartphone applications<br><b>Explicit SM:</b> Focus of review was monitoring and action plans                                                                          | 0/1 reported improved symptoms<br>1/2 reported improved health-related QOL<br>1/2 reported reduced emergency dept. visits<br>0/2 showed reduced hospital admissions                                                                                                                                                                                                              | <b>Asthma:</b> illustrated as neutral<br>Inadequate information for one study to assess risk of bias [SR]                                                                                                                                         |
| <b>** McLean 2010</b><br>21 RCTs, n=12038<br>R-AMSTAR = 42<br>Asthma         | <b>TH:</b> Home-based TH including telemonitoring and structured telephone support<br><b>Implied SM:</b> Focus of SR was monitoring and action plans and information and education | Meta-analyses: significant reduction versus control in hospitalisation after 12 months (OR 0.21 (95%CI 0.0 to 0.61)).<br>No significant reduction in emergency department visits or hospitalisation after 3 months (OR 1.16 (95%CI 0.52 to 2.58) and 0.47 (95%CI 0.01 to 36.46), respectively).<br>Improvement in health-related QOL was below clinically significant threshold. | <b>Asthma:</b> illustrated as neutral<br>Poor randomisation procedure and overall variable quality of primary studies.[SR]                                                                                                                        |
| <b>COPD Reviews</b>                                                          |                                                                                                                                                                                    |                                                                                                                                                                                                                                                                                                                                                                                  |                                                                                                                                                                                                                                                   |
| <b>* Bolton 2011</b><br>2 RCTs, n=139<br>R-AMSTAR = 32<br>COPD               | <b>TH:</b> Interactive physiological telemonitoring<br><b>Implied SM:</b> Focus of SR was monitoring and action plan; information and education (n=1)                              | 1/1 reported improved QOL (St George’s Respiratory Questionnaire)<br>1/1 reported fewer hospital admissions and emergency dept. visits<br>No significant reduction in exacerbation frequency                                                                                                                                                                                     | <b>COPD:</b> illustrated as positive (hatched)<br>High risk of bias in quality assessment within review. [SR]<br>RCTs: small sample sizes; only one including SM component.<br>Publication bias not assessed [MR]                                 |
| <b>* Cruz 2014</b><br>7 RCTs, n=392<br>R-AMSTAR = 36<br>COPD                 | <b>TH:</b> Home telemonitoring<br><b>Implied SM:</b> Focus of SR was monitoring with action plan                                                                                   | Meta analyses: statistically significant improvement vs control in hospitalisation rate (– RR 0.72 (95%CI 0.53 to 0.98)) and QOL using SGRQ (SMD -0.53 (95%CI -0.97 to -0.09))                                                                                                                                                                                                   | <b>COPD:</b> illustrated as neutral<br>Small sample sizes of RCTs (although good quality). Unable to incorporate data from some studies as it was not comparable.                                                                                 |

|                                                                                            |                                                                                                                                                                                      |                                                                                                                                                                                                                                                                                                    |                                                                                                                                                                                                                        |
|--------------------------------------------------------------------------------------------|--------------------------------------------------------------------------------------------------------------------------------------------------------------------------------------|----------------------------------------------------------------------------------------------------------------------------------------------------------------------------------------------------------------------------------------------------------------------------------------------------|------------------------------------------------------------------------------------------------------------------------------------------------------------------------------------------------------------------------|
|                                                                                            |                                                                                                                                                                                      | No significant difference in mean number of hospitalisations (SMD -0.06 (95%CI -0.32 to 0.19)) emergency dept. visits (RR 0.68 (95%CI 0.38 to 1.18)) and mortality (RR=1.43, 95%CI 0.40-5.03)                                                                                                      | <i>Exclusion of non-English studies (Portuguese and Spanish accepted). Unable to assess for publication bias.[SR]</i>                                                                                                  |
| <b>** Flodgren 2015</b><br>3 RCTs, n=130<br>R-AMSTAR = 44<br>COPD                          | <b>TH:</b> Interactive TH excluding telephone-only interventions<br><b>Explicit SM:</b> Focus of SR was clinical review and advice; information and education (n=3)                  | 1/1 reported no difference in healthcare utilisation<br>1/1 reported no difference in symptom score<br>1/1 reported improved health related QOL                                                                                                                                                    | <b>COPD:</b> illustrated as neutral                                                                                                                                                                                    |
| <b>* Franek 2012</b><br>6 RCTs, n=310<br>R-AMSTAR = 33<br>COPD                             | <b>TH:</b> Home telemonitoring and telephone-only support<br><b>Implied SM:</b> Focus of SR was monitoring and action plan; information and education (n=2)                          | 2/6 reported reduced hospitalisation<br>1/3 reported reduced emergency dept. visits<br>2/2 reported improved health related QOL<br>0/1 reported improved mortality<br>0/1 reported reduced exacerbations<br>1/1 reported improved self-efficacy                                                    | <b>COPD:</b> illustrated as neutral<br><i>Definitions of hospitalisation differed between studies. Low quality of evidence according to quality assessment. High level of heterogeneity limiting conclusions. [SR]</i> |
| <b>** Kuijpers 2012</b><br>2 RCTs<br>R-AMSTAR = 31<br>COPD                                 | <b>TH:</b> Internet-based interventions<br><b>Explicit SM:</b> Focus of SR was lifestyle advice/support; psychological support (n=1)                                                 | 1/2 reported significant improvement in self-efficacy                                                                                                                                                                                                                                              | <b>Excluded:</b> no control outcomes<br><i>Limited description of methods in primary studies including randomisation process.[SR]. Publication bias not assessed [MR]</i>                                              |
| <b>** Lundell 2015</b><br>9 RCTs, n=982<br>R-AMSTAR = 39<br>COPD                           | <b>TH:</b> Interactive telemonitoring or counselling<br><b>Explicit SM:</b> Focus of SR was clinical review and advice                                                               | Meta-analyses: significant improvement vs control in time spent physically active (MD 64.7mins, 95%CI 54.4 to 74.9)<br>No significant difference in exercise tolerance (MD 1.3 m (95% CI -8.1 to 5.5)) and dyspnoea score (MD 0.088 (95% CI 0.056 to 0.233))                                       | <b>COPD:</b> illustrated as neutral                                                                                                                                                                                    |
| <b>** McLean 2011</b><br>10 RCTs, n=1004<br>R-AMSTAR = 43<br>COPD                          | <b>TH:</b> Home-based TH including telemonitoring and structured telephone support<br><b>Implied SM:</b> Focus of SR was monitoring and action plan; information and education (n=4) | Meta-analyses: significant reduction vs control in hospitalisations (OR 0.27 (95% CI 0.11 to 0.66) and emergency dept. visits OR 0.46 (95%CI 0.33 to 0.65)<br>No significant difference in mortality (OR 1.05 (95%CI 0.63 to 1.75)) or QOL (MD in SGRQ. -6.57 (95%CI -13.62 to 0.48))              | <b>COPD:</b> illustrated as positive (hatched)<br><i>Heterogeneity in definitions of COPD and interventions evaluated. Theoretical work and modelling of complex interventions unclear[SR]</i>                         |
| <b>* Polisena 2010</b><br>7 RCTs, n=697<br>R-AMSTAR = 35<br>COPD                           | <b>TH:</b> Home telemonitoring and telephone support<br><b>Implied SM:</b> Focus of SR was monitoring with action plan                                                               | Meta-analysis: no significant difference in mortality between telephone support and control (RR 1.07 (95% CI 0.70 to 1.62))*<br>No overall improvement in QOL with home telemonitoring<br>With telephone support 5/5 reported fewer hospitalisations and 4/4 reported fewer emergency dept. visits | <b>COPD:</b> illustrated as neutral<br><i>Clinical heterogeneity due to diverse study populations and study design. Insufficient number of studies to assess publication bias. [SR]</i>                                |
| <b>Cancer Reviews</b>                                                                      |                                                                                                                                                                                      |                                                                                                                                                                                                                                                                                                    |                                                                                                                                                                                                                        |
| <b>** Beatty 2013</b><br>1 RCT, n=62<br>R-AMSTAR=31<br>Breast cancer                       | <b>TH:</b> Moderated internet-based self-help<br><b>Explicit SM:</b> Focus of SR was lifestyle advice/support; psychological support (n=1)                                           | 0/1 showed improvements in QOL or 'emotional wellbeing'                                                                                                                                                                                                                                            | <b>Cancer:</b> illustrated as neutral<br><i>Level of professional input is unclear – may not truly qualify as telehealth. [MR]</i>                                                                                     |
| <b>**Kuijpers 2012</b><br>1 RCT, n=325<br>R-AMSTAR=31<br>Breast cancer and prostate cancer | <b>TH:</b> Internet-based interventions<br><b>Explicit SM:</b> Focus of SR was lifestyle advice/support                                                                              | No significant improvement in patient empowerment                                                                                                                                                                                                                                                  | <b>Excluded:</b> no control outcomes<br><i>Little evidence directed at cancer specifically. Limited description of methods in primary studies including randomisation process. [SR]</i>                                |
| <b>* McAlpine 2015</b>                                                                     | <b>TH:</b> Online education                                                                                                                                                          | 0/2 reported improved QOL                                                                                                                                                                                                                                                                          | <b>Cancer:</b> illustrated as neutral                                                                                                                                                                                  |

|                                                                            |                                                                                                                     |                                      |                                    |
|----------------------------------------------------------------------------|---------------------------------------------------------------------------------------------------------------------|--------------------------------------|------------------------------------|
| 4 RCTs<br>R-AMSTAR= 29<br>Cancer (lung n=1,<br>breast n=1, various<br>n=2) | programmes linking patient<br>with clinician<br><b>Explicit SM:</b> Focus of SR<br>was information and<br>education | 1/2 reported improved symptom scores | <i>No quality assessment [MR].</i> |
|----------------------------------------------------------------------------|---------------------------------------------------------------------------------------------------------------------|--------------------------------------|------------------------------------|

**Abbreviations**

CI – confidence interval; COPD – Chronic Obstructive Pulmonary Disease; DM- diabetes mellitus; HF – heart failure; MD – mean difference; PEF – Peak expiratory flow; RCT – randomised controlled trial; RR – Relative risk; SGRQ - St George's Respiratory Questionnaire; SR – Systematic review; T1DM – type 1 diabetes mellitus; T2DM – type 2 diabetes mellitus; TH – Telehealth

\*The risk ratio was originally published as 1.21 (95%CI 0.84 to 1.75), however this was shown to have been the result of an error which was subsequently identified (ref) and corrected (ref).
